# Supplementary material for: Radiocarbon, Bayesian chronological modeling and early European metal circulation in the sixteenth-century AD Mohawk River Valley, USA
Source: PubMed Central journal article supplement (PMC6913979; doi:10.1371/journal.pone.0226334), 2019-12-16
Supplement: pone.0226334.s001.pdf [file pone.0226334.s001.pdf]

# NYSM Mineralogy #7005. Native copper from Houghton County, Michigan

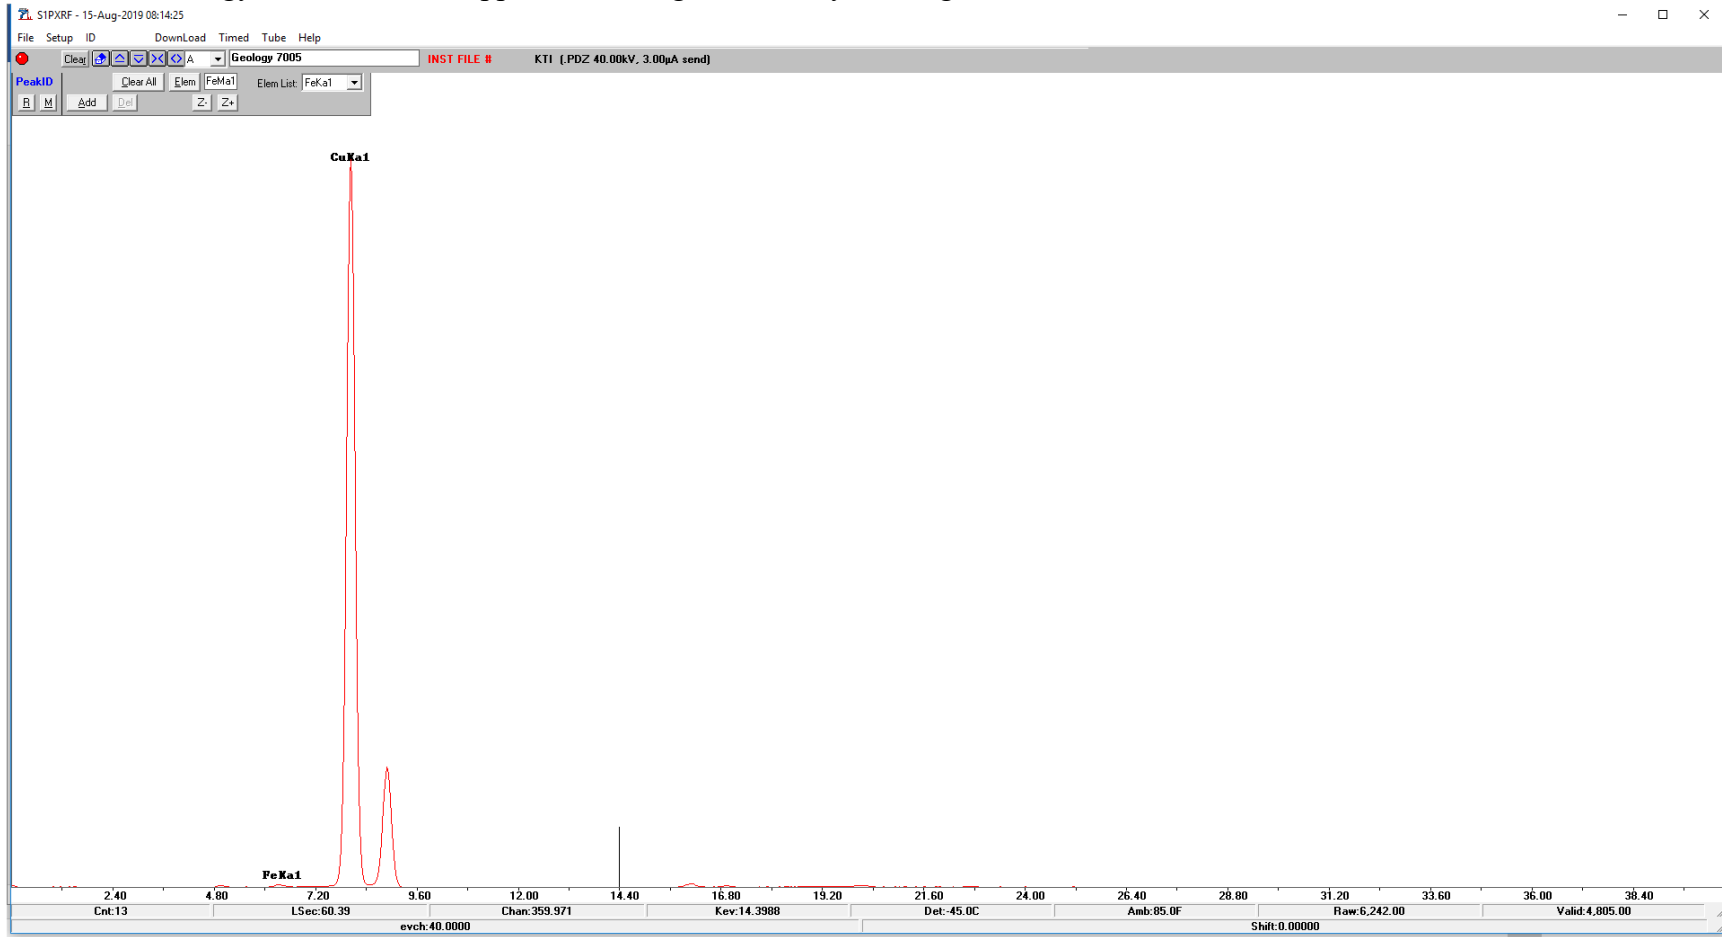

| Geology 7005 | Energy1 | Energy2 | Chan-Start | Chan-End | Chan-Counts | ROI     |
|--------------|---------|---------|------------|----------|-------------|---------|
| FeKa1        | 6.2347  | 6.5730  | 155.8667   | 164.3253 | 887.85      | 0.00408 |
| CuKa1        | 7.8658  | 8.2298  | 196.6451   | 205.7439 | 216701.80   | 0.99592 |

Morse A-20529 pre-contact rolled native copper bead, Jefferson County, New York

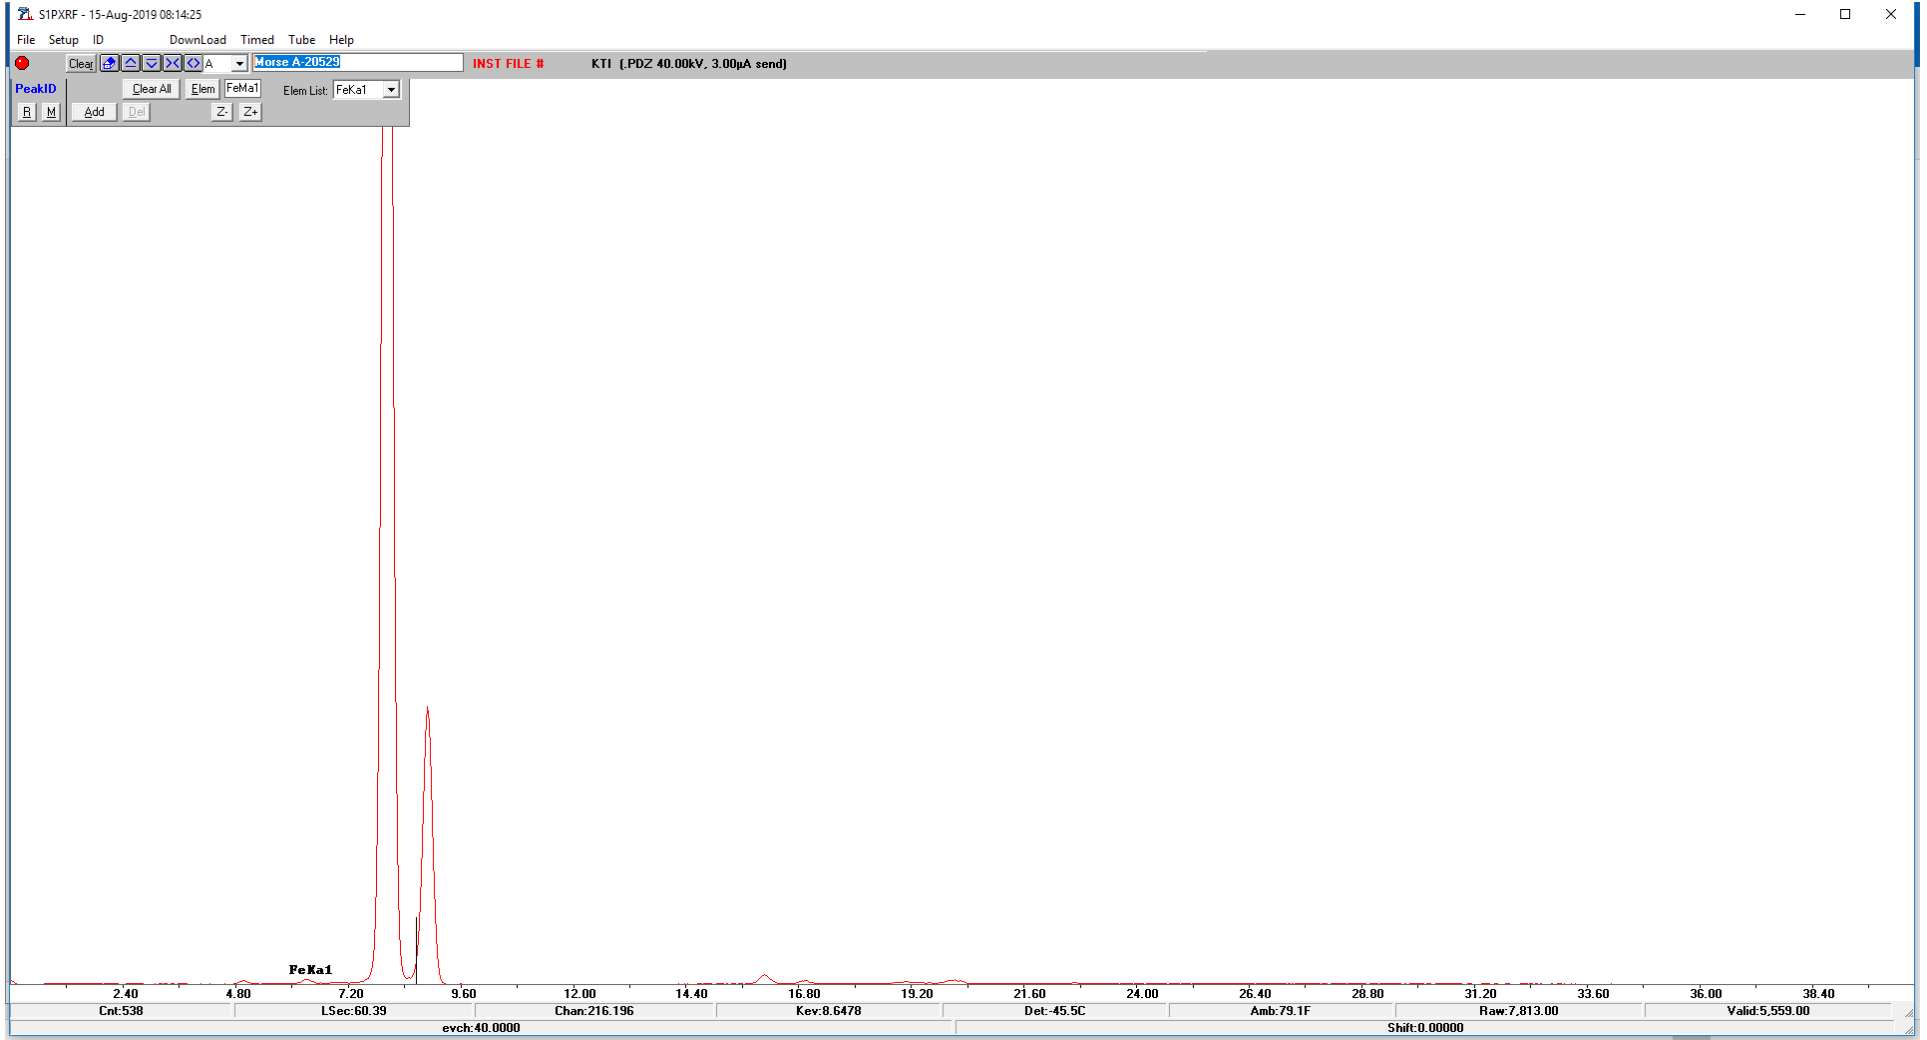

| Morse A-20529 | Energy1 | Energy2 | Chan-Start | Chan-End | Chan-Counts | ROI      |
|---------------|---------|---------|------------|----------|-------------|----------|
| FeKa1         | 6.2347  | 6.573   | 155.8667   | 164.3253 | 809.51      | 0.003224 |
| CuKa1         | 7.8658  | 8.2298  | 196.6451   | 205.7439 | 250266.3    | 0.996776 |

Morse A-27393A pre-contact rolled native copper bead, Jefferson County, New York

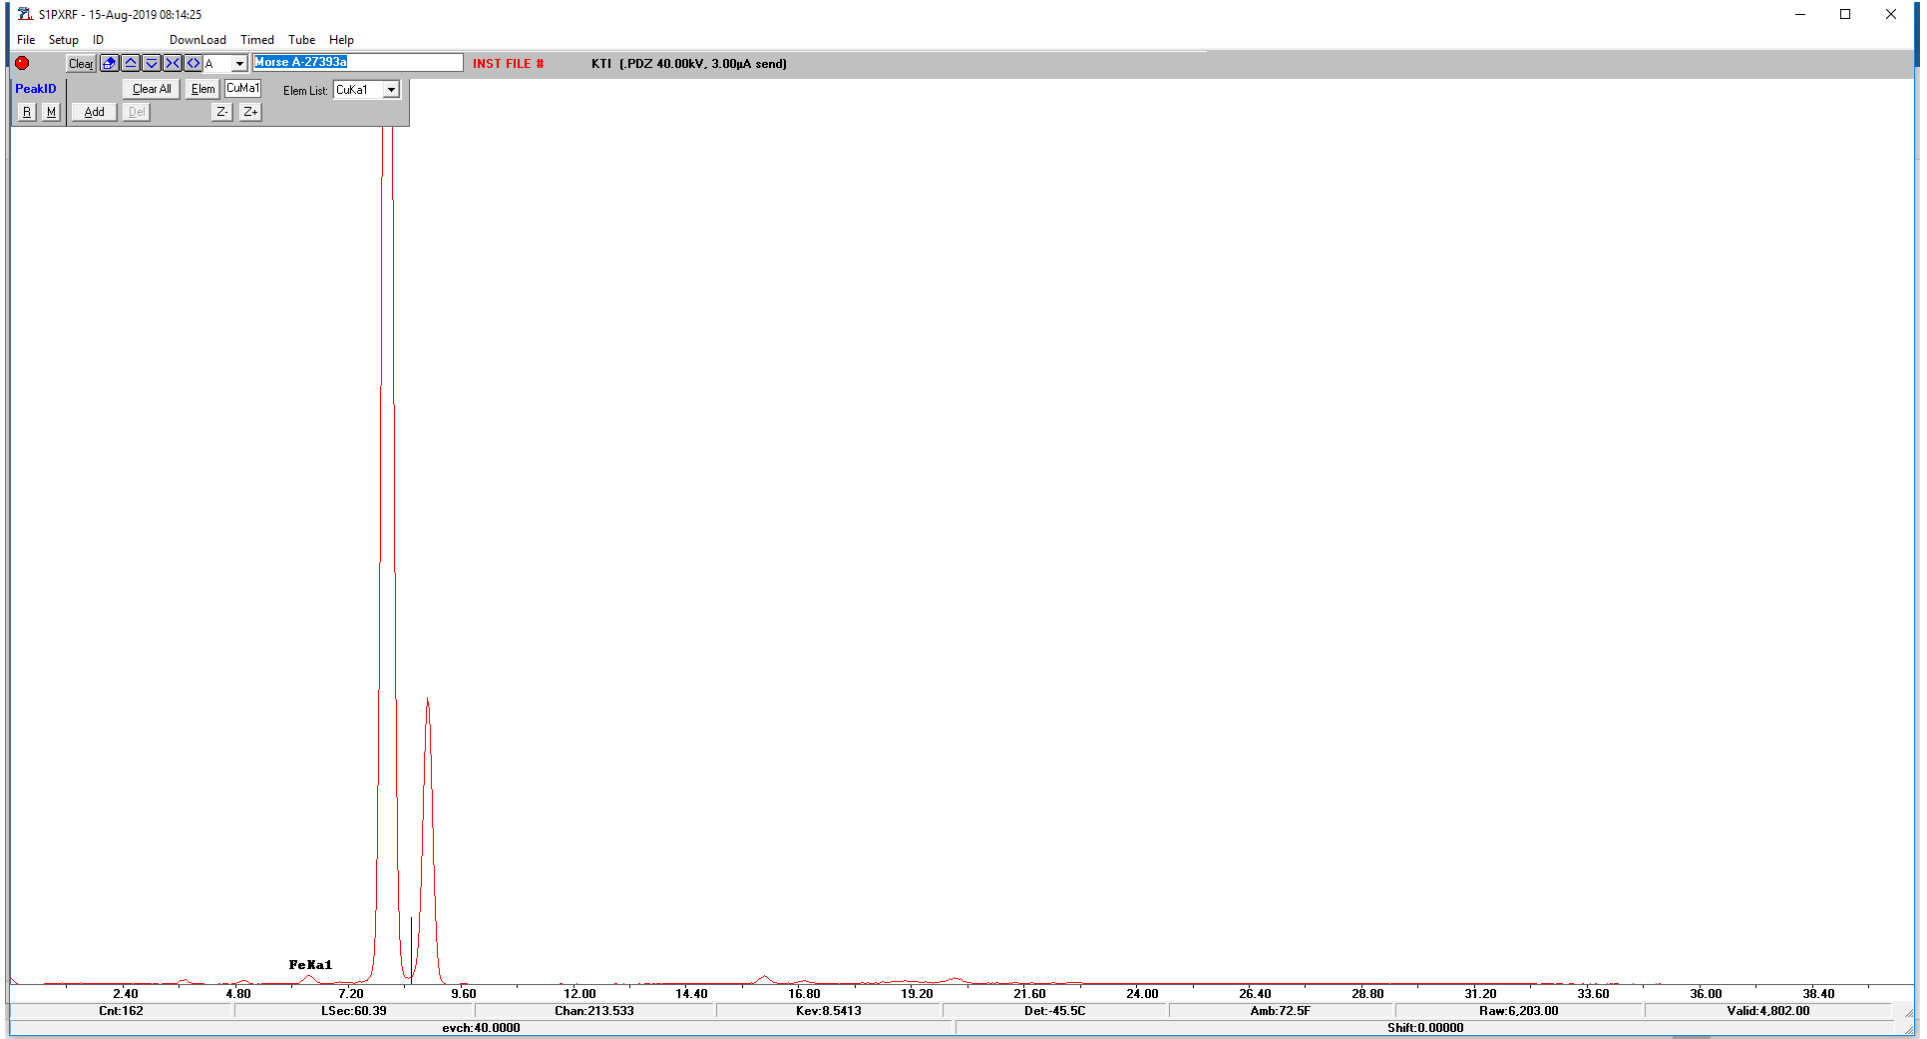

| Morse A27393A | Energy1 | Energy2 | Chan-Start | Chan-End | Chan-Counts | ROI      |
|---------------|---------|---------|------------|----------|-------------|----------|
| FeKa1         | 6.2347  | 6.573   | 155.8667   | 164.3253 | 1207.03     | 0.005765 |
| CuKa1         | 7.8658  | 8.2298  | 196.6451   | 205.7439 | 208171.4    | 0.994235 |

Morse A-27393D pre-contact rolled native copper bead, Jefferson County, New York

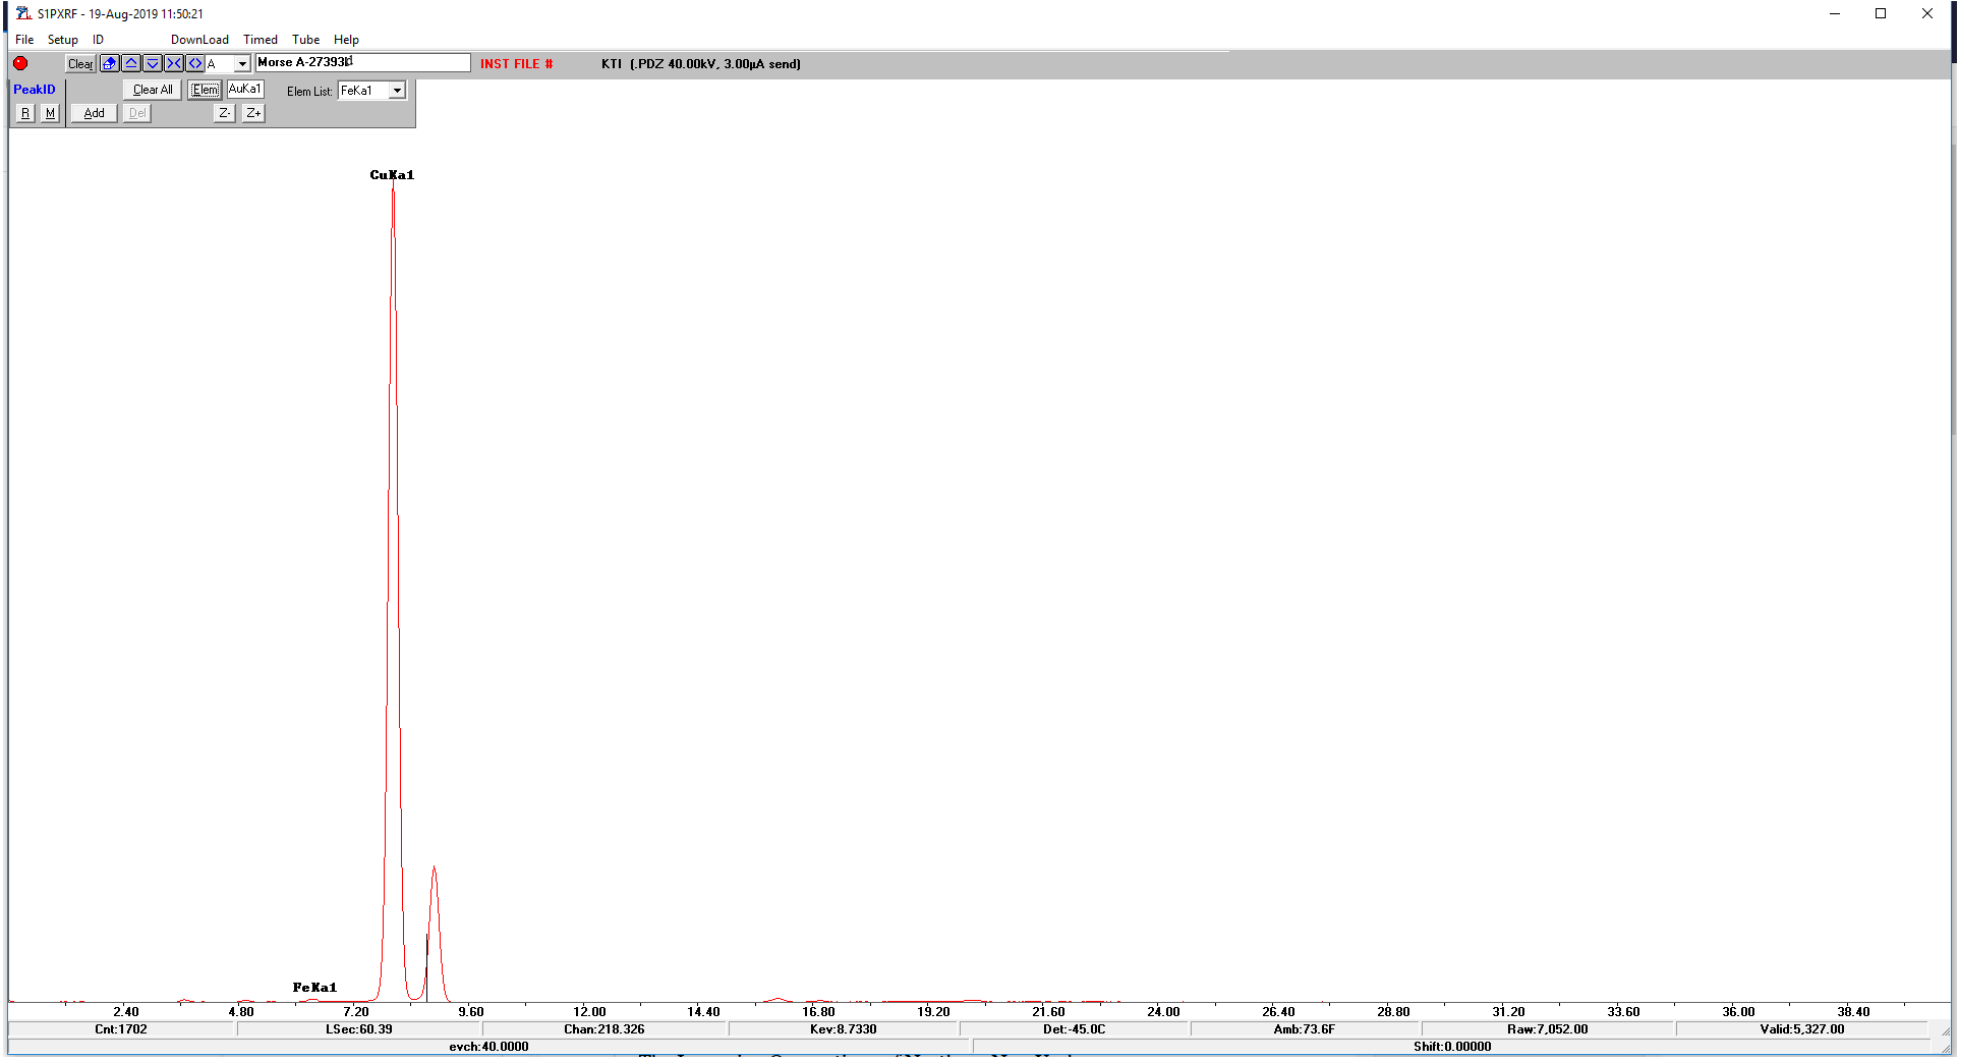

| Morse A-27393d | Energy1 | Energy2 | Chan-Start | Chan-End | Chan-Counts | ROI       |
|----------------|---------|---------|------------|----------|-------------|-----------|
| FeKa1          | 6.2347  | 6.573   | 155.8667   | 164.3253 | 1015.58     | 0.0043560 |
| CuKa1          | 7.8658  | 8.2298  | 196.6451   | 205.7439 | 232126.76   | 0.9956439 |

Getman A2002.47DU.99.10 pre-contact native copper crescent-shaped tanged knife.

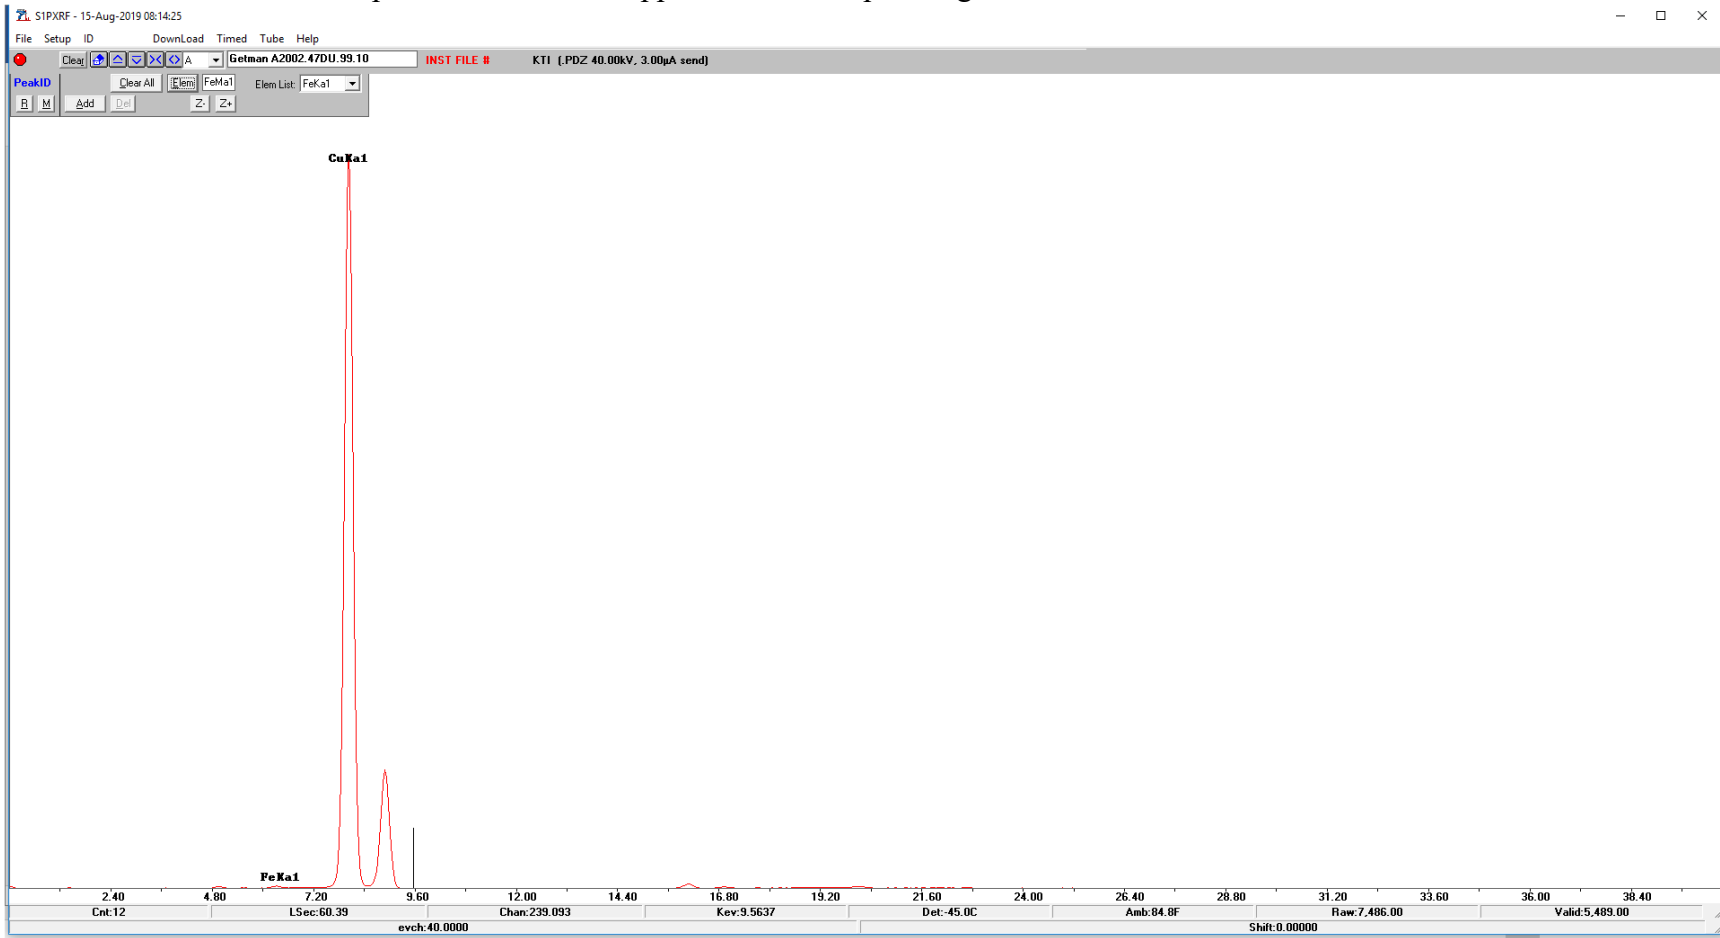

| Getman A2002.47DU.99.10 | Energy1 | Energy2 | Chan-Start | Chan-End | Chan-Counts | ROI      |
|-------------------------|---------|---------|------------|----------|-------------|----------|
| FeKa1                   | 6.2347  | 6.573   | 155.8667   | 164.3253 | 838.98      | 0.003344 |
| CuKa1                   | 7.8658  | 8.2298  | 196.6451   | 205.7439 | 25027.2     | 0.996656 |

# Smith Pagerie A2002.32AC.7.38 native copper rolled bead

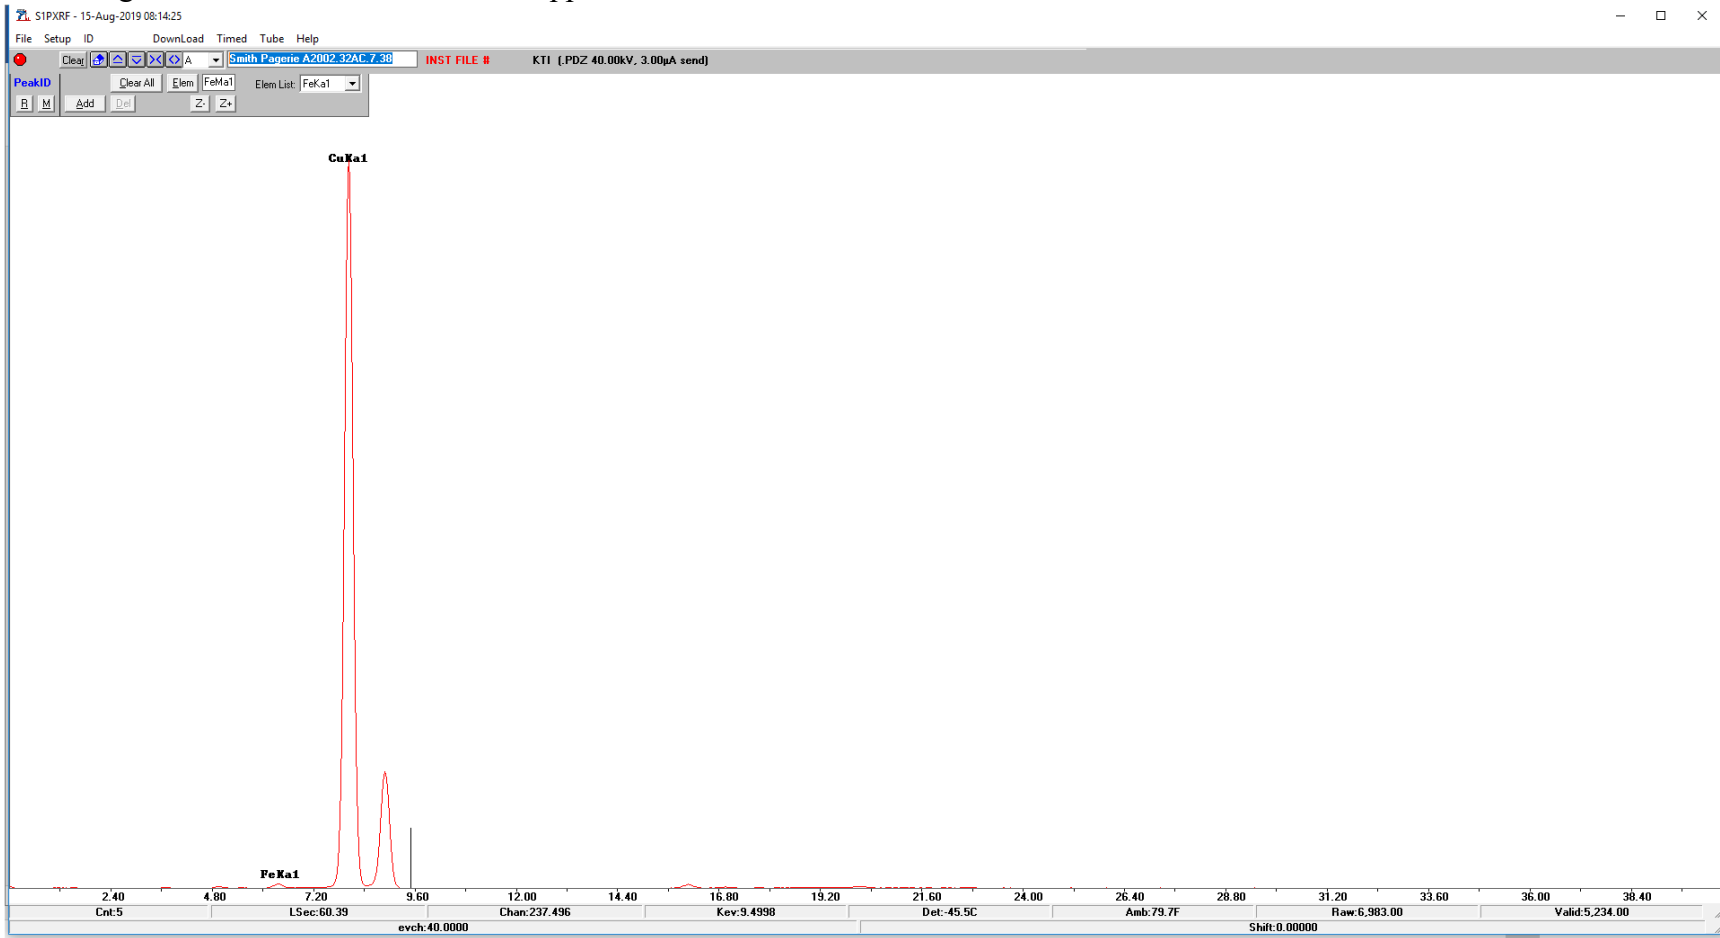

| Smith Pagerie A2002.32AC.7.38 | Energy1 | Energy2 | Chan-Start | Chan-End | Chan-Counts | ROI      |
|-------------------------------|---------|---------|------------|----------|-------------|----------|
| FeKa1                         | 6.2347  | 6.573   | 155.8667   | 164.3253 | 1527.8      | 0.006573 |
| CuKa1                         | 7.8658  | 8.2298  | 196.6451   | 205.7439 | 230920.2    | 0.993427 |

# Smith Pagerie A-44736 European copper rolled bead

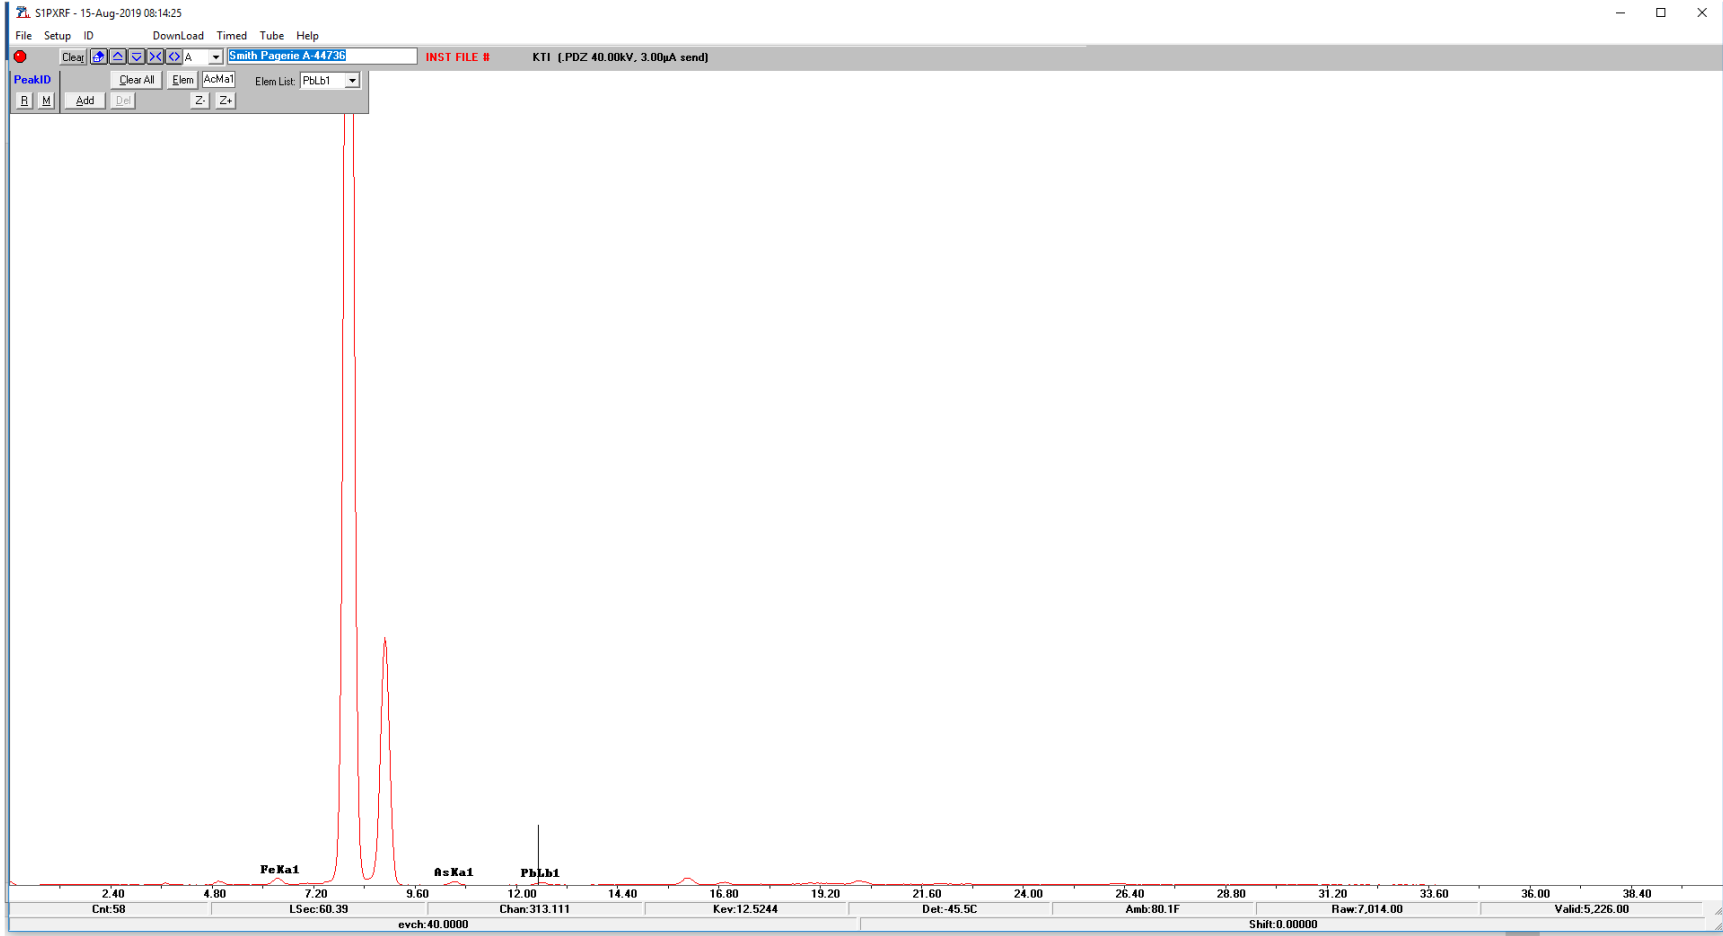

| Smith Pagerie A-44736 | Energy1 | Energy2 | Chan-Start | Chan-End | Chan-Counts | ROI      |
|-----------------------|---------|---------|------------|----------|-------------|----------|
| FeKa1                 | 6.2347  | 6.573   | 155.8667   | 164.3253 | 1194.97     | 0.005165 |
| CuKa1                 | 7.8658  | 8.2298  | 196.6451   | 205.7439 | 228992.3    | 0.989813 |
| AsKa1                 | 10.3439 | 10.7436 | 258.5966   | 268.5894 | 614.48      | 0.002656 |
| PbLb1                 | 12.4002 | 12.8272 | 310.0038   | 320.6812 | 547.38      | 0.002366 |

# Garoga A-42864A European copper scrap

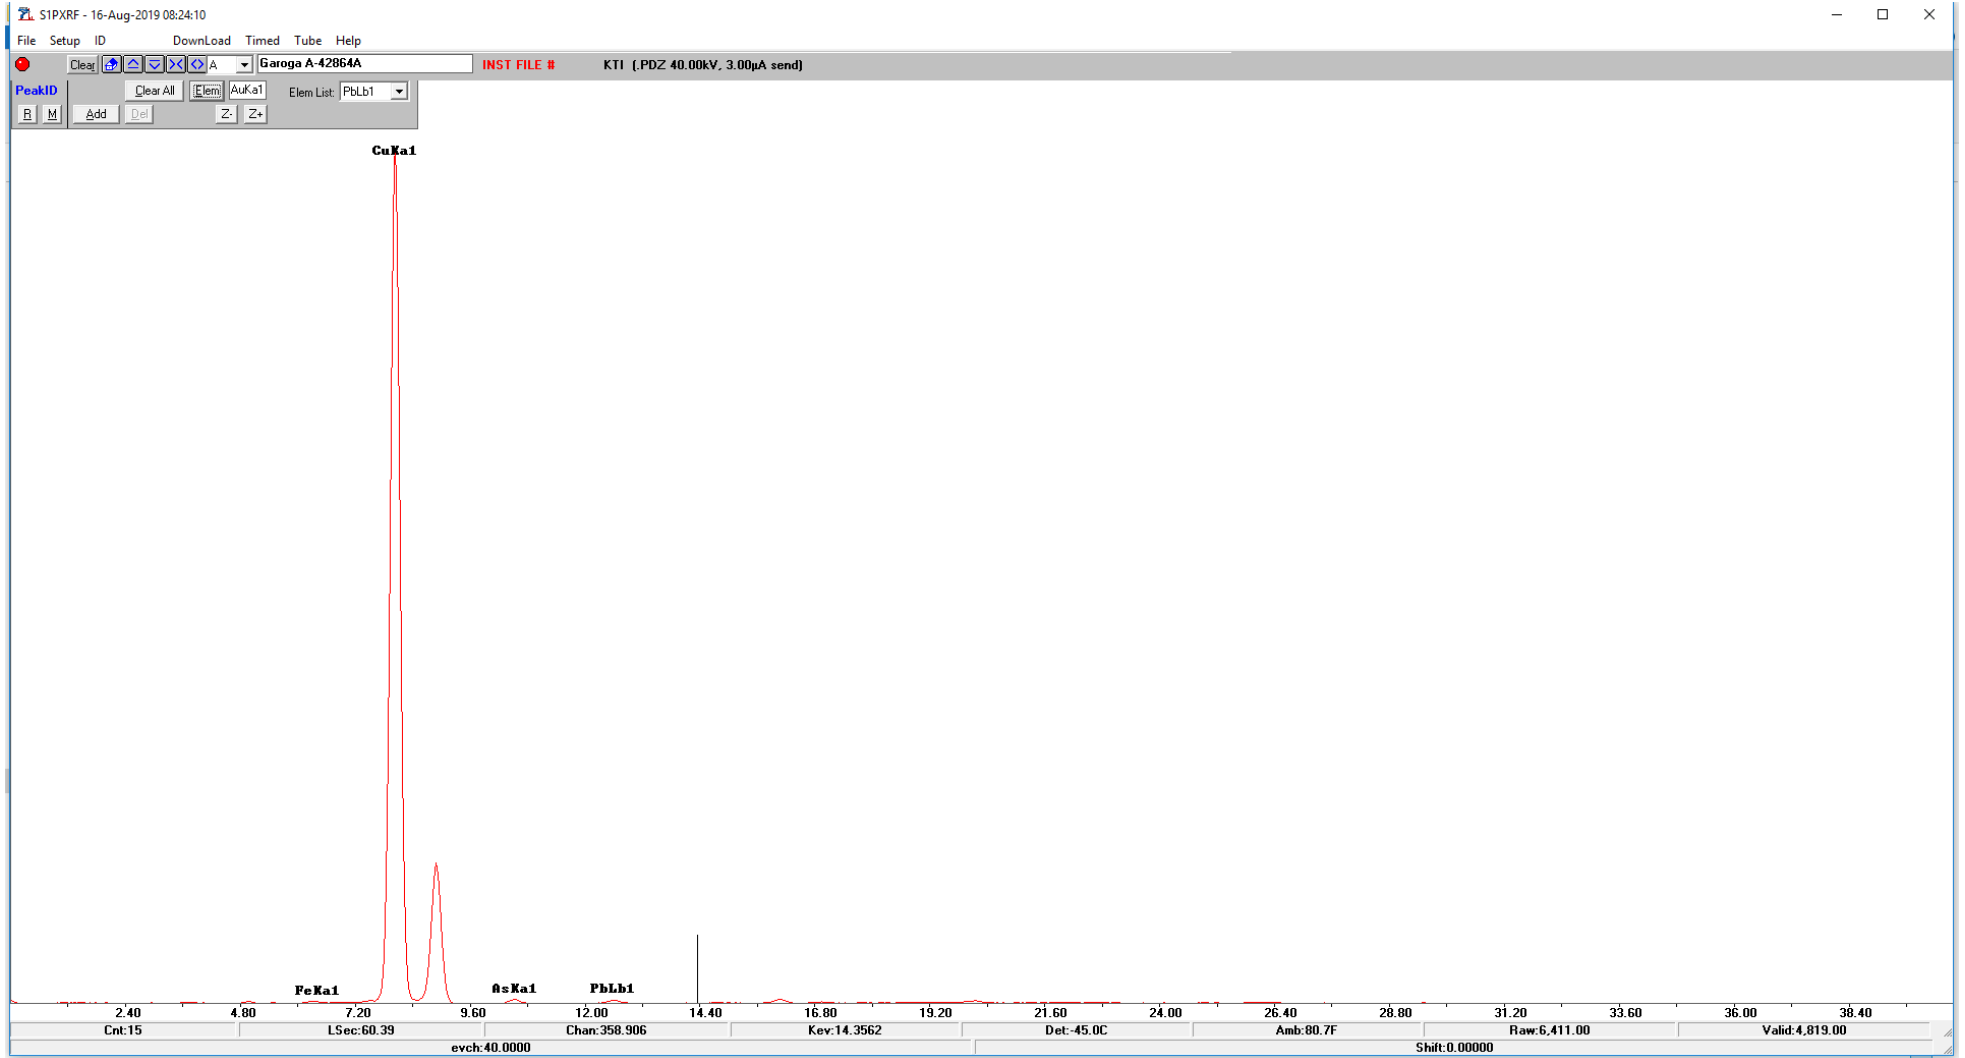

| Garoga A-42864A | Energy1 | Energy2 | Chan-Start | Chan-End | Chan-Counts | ROI      |
|-----------------|---------|---------|------------|----------|-------------|----------|
| FeKa1           | 6.2347  | 6.573   | 155.8667   | 164.3253 | 687.52      | 0.003128 |
| CuKa1           | 7.8658  | 8.2298  | 196.6451   | 205.7439 | 216998.5    | 0.987285 |
| AsKa1           | 10.3439 | 10.7436 | 258.5966   | 268.5894 | 1095.6      | 0.004985 |
| PbLb1           | 12.4002 | 12.8272 | 310.0038   | 320.6812 | 1011.45     | 0.004602 |

Garoga A2009.07BB.99.15 European copper alloy tube/bead.



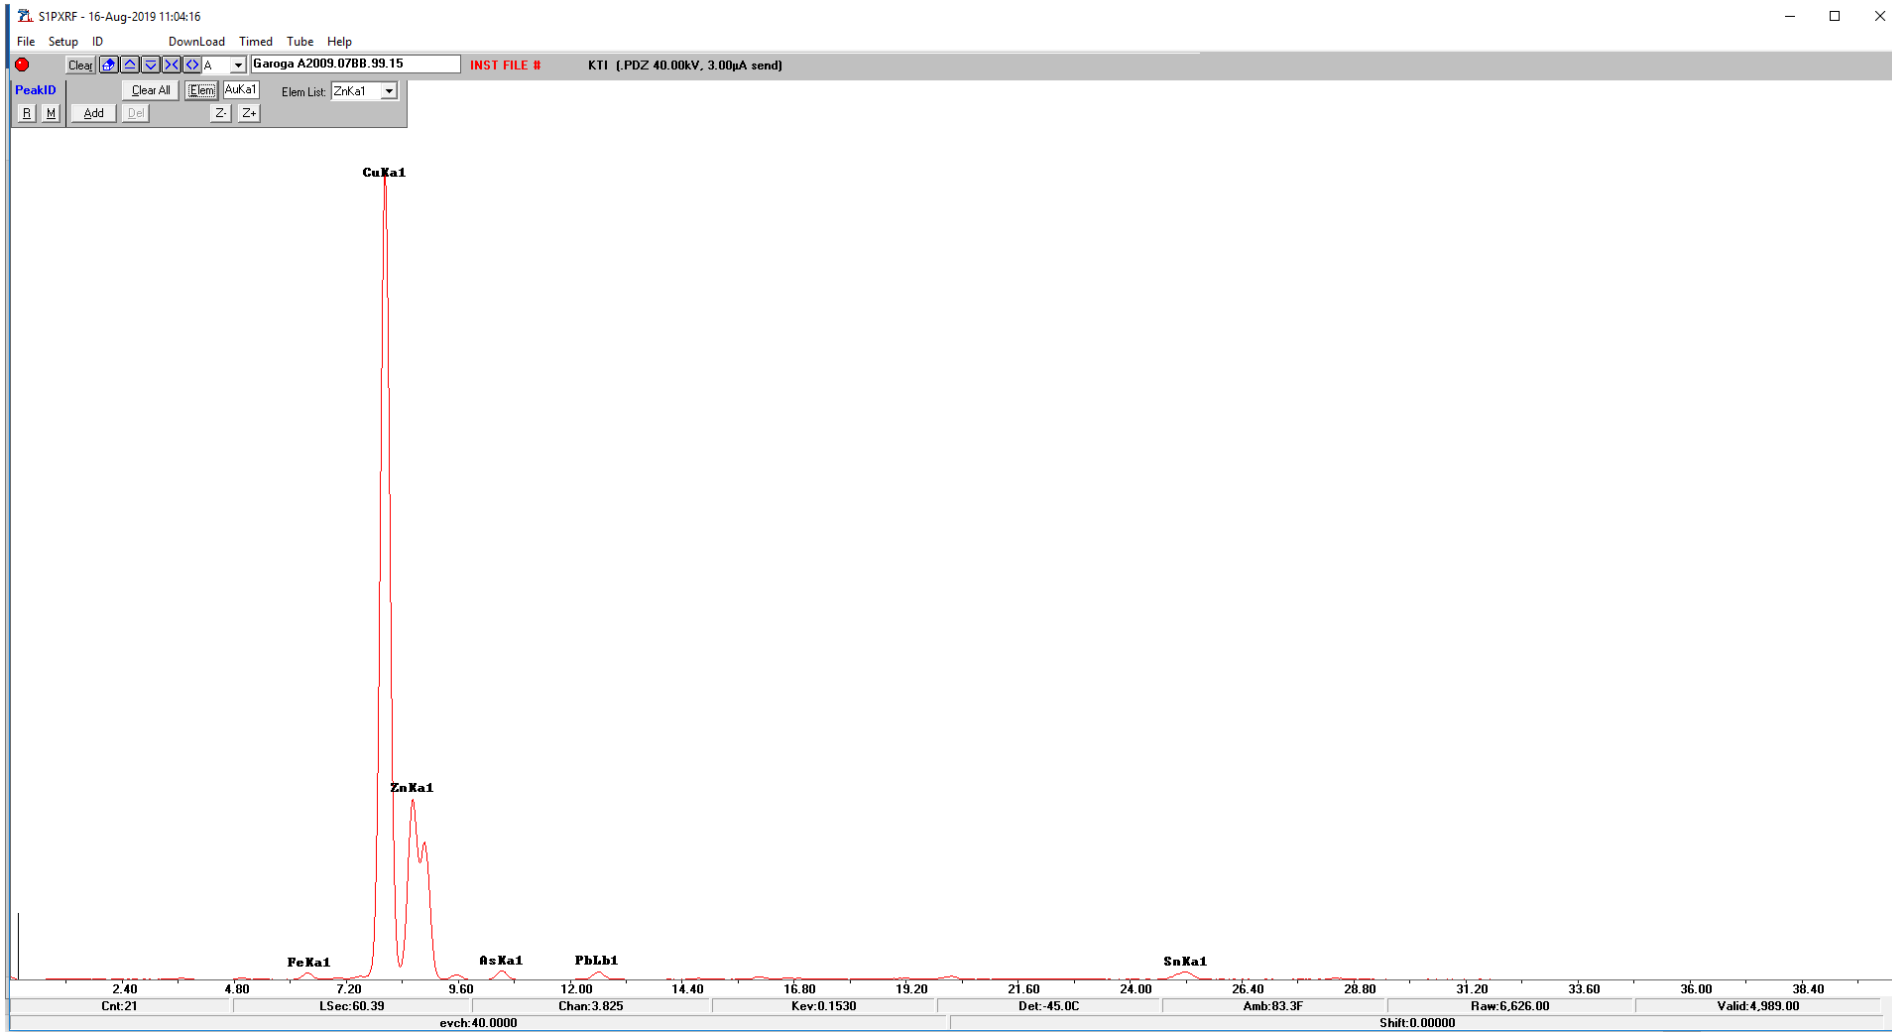

| Garoga A2009.07BB.99.15 | Energy1 | Energy2 | Chan-Start | Chan-End | Chan-Counts | ROI      |
|-------------------------|---------|---------|------------|----------|-------------|----------|
| FeKa1                   | 6.2347  | 6.573   | 155.8667   | 164.3253 | 16134.61    | 0.006826 |
| CuKa1                   | 7.8658  | 8.2298  | 196.6451   | 205.7439 | 1820347     | 0.770156 |
| ZnKa1                   | 8.4525  | 8.8252  | 211.3124   | 220.6306 | 451098.7    | 0.190852 |
| AsKa1                   | 10.3439 | 10.7436 | 258.5966   | 268.5894 | 23060.43    | 0.009756 |
| PbLb1                   | 12.4002 | 12.8272 | 310.0038   | 320.6812 | 20935.04    | 0.008857 |
| SnKa1                   | 24.9881 | 25.5545 | 624.7016   | 638.8634 | 32031.36    | 0.013552 |

Cayadutta European copper amulet

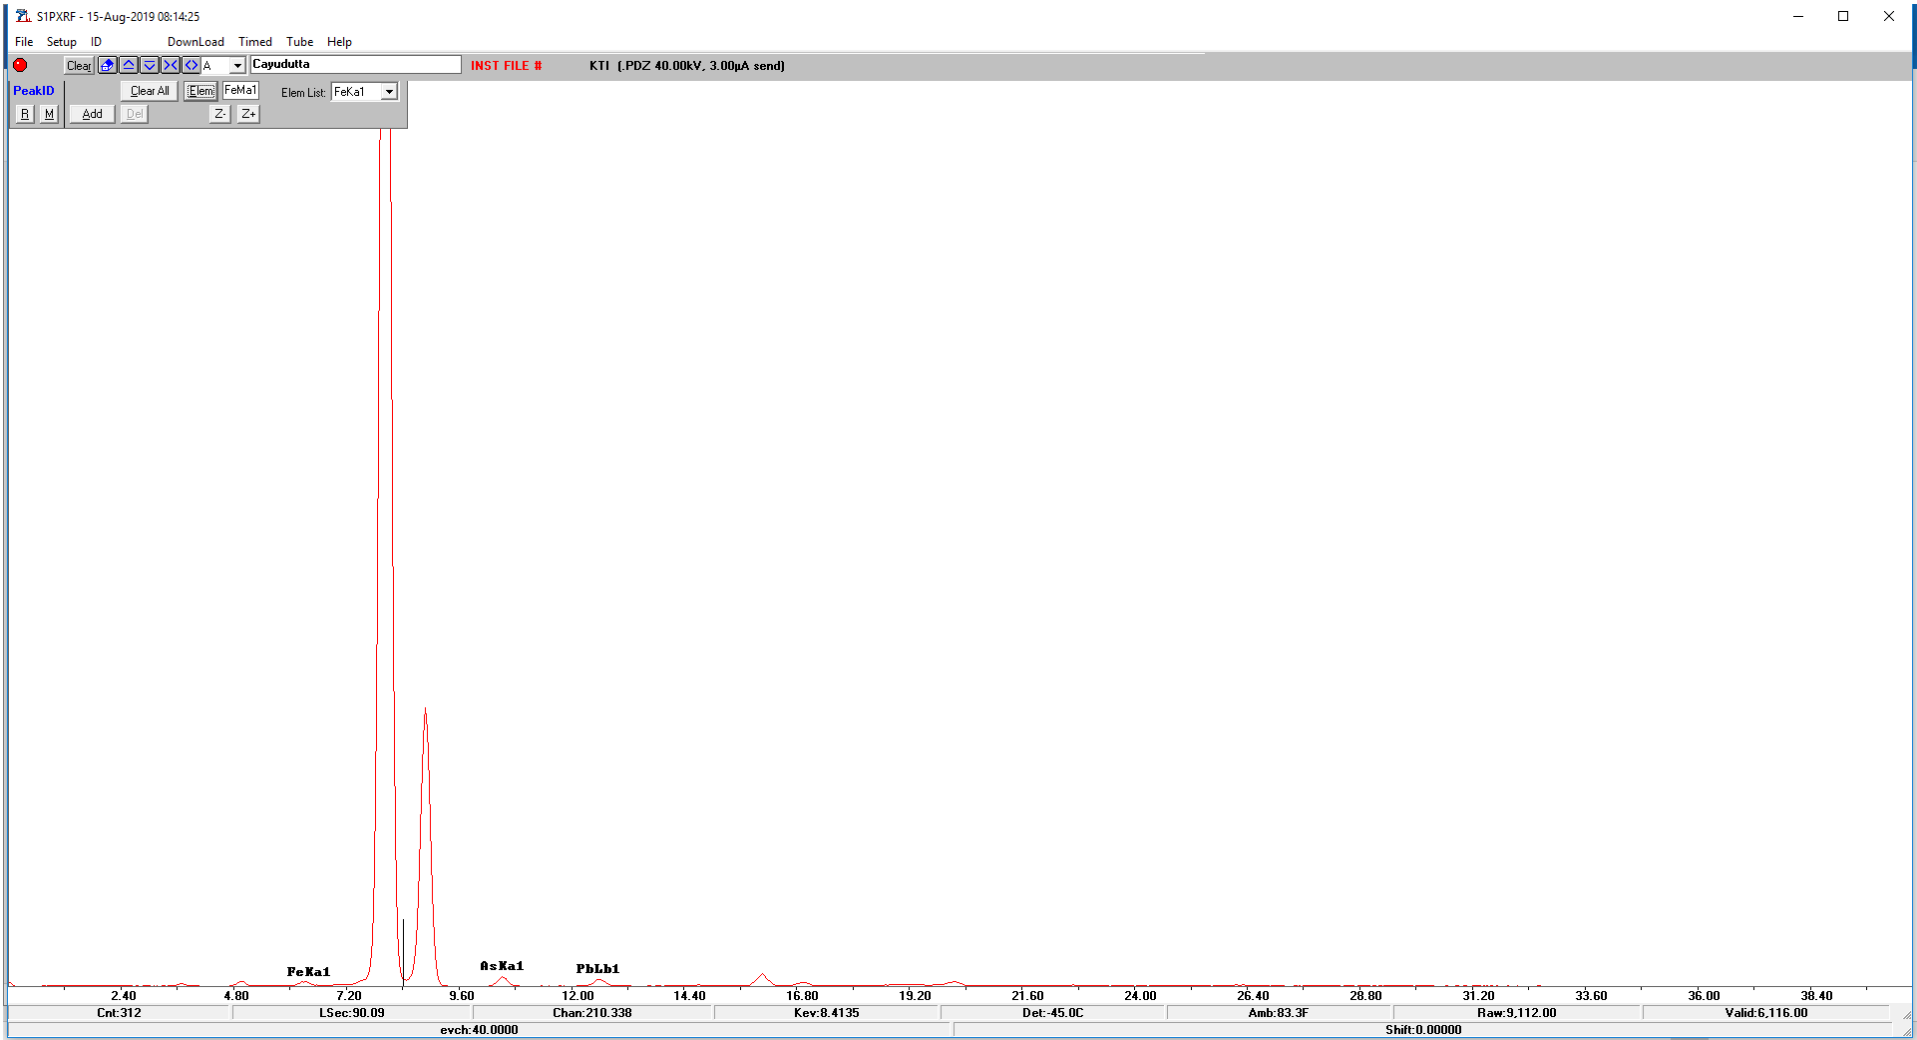

| Cayudutta | Energy1 | Energy2 | Chan-Start | Chan-End | Chan-Counts | ROI      |
|-----------|---------|---------|------------|----------|-------------|----------|
| FeKa1     | 6.2347  | 6.573   | 155.8667   | 164.3253 | 1306.16     | 0.003125 |
| CuKa1     | 7.8658  | 8.2298  | 196.6451   | 205.7439 | 412098.4    | 0.986099 |
| AsKa1     | 10.3439 | 10.7436 | 258.5966   | 268.5894 | 2441.42     | 0.005842 |
| PbLb1     | 12.4002 | 12.8272 | 310.0038   | 320.6812 | 2061.95     | 0.004934 |

# Wormuth A2002.10CC.4.7a European copper alloy scrap

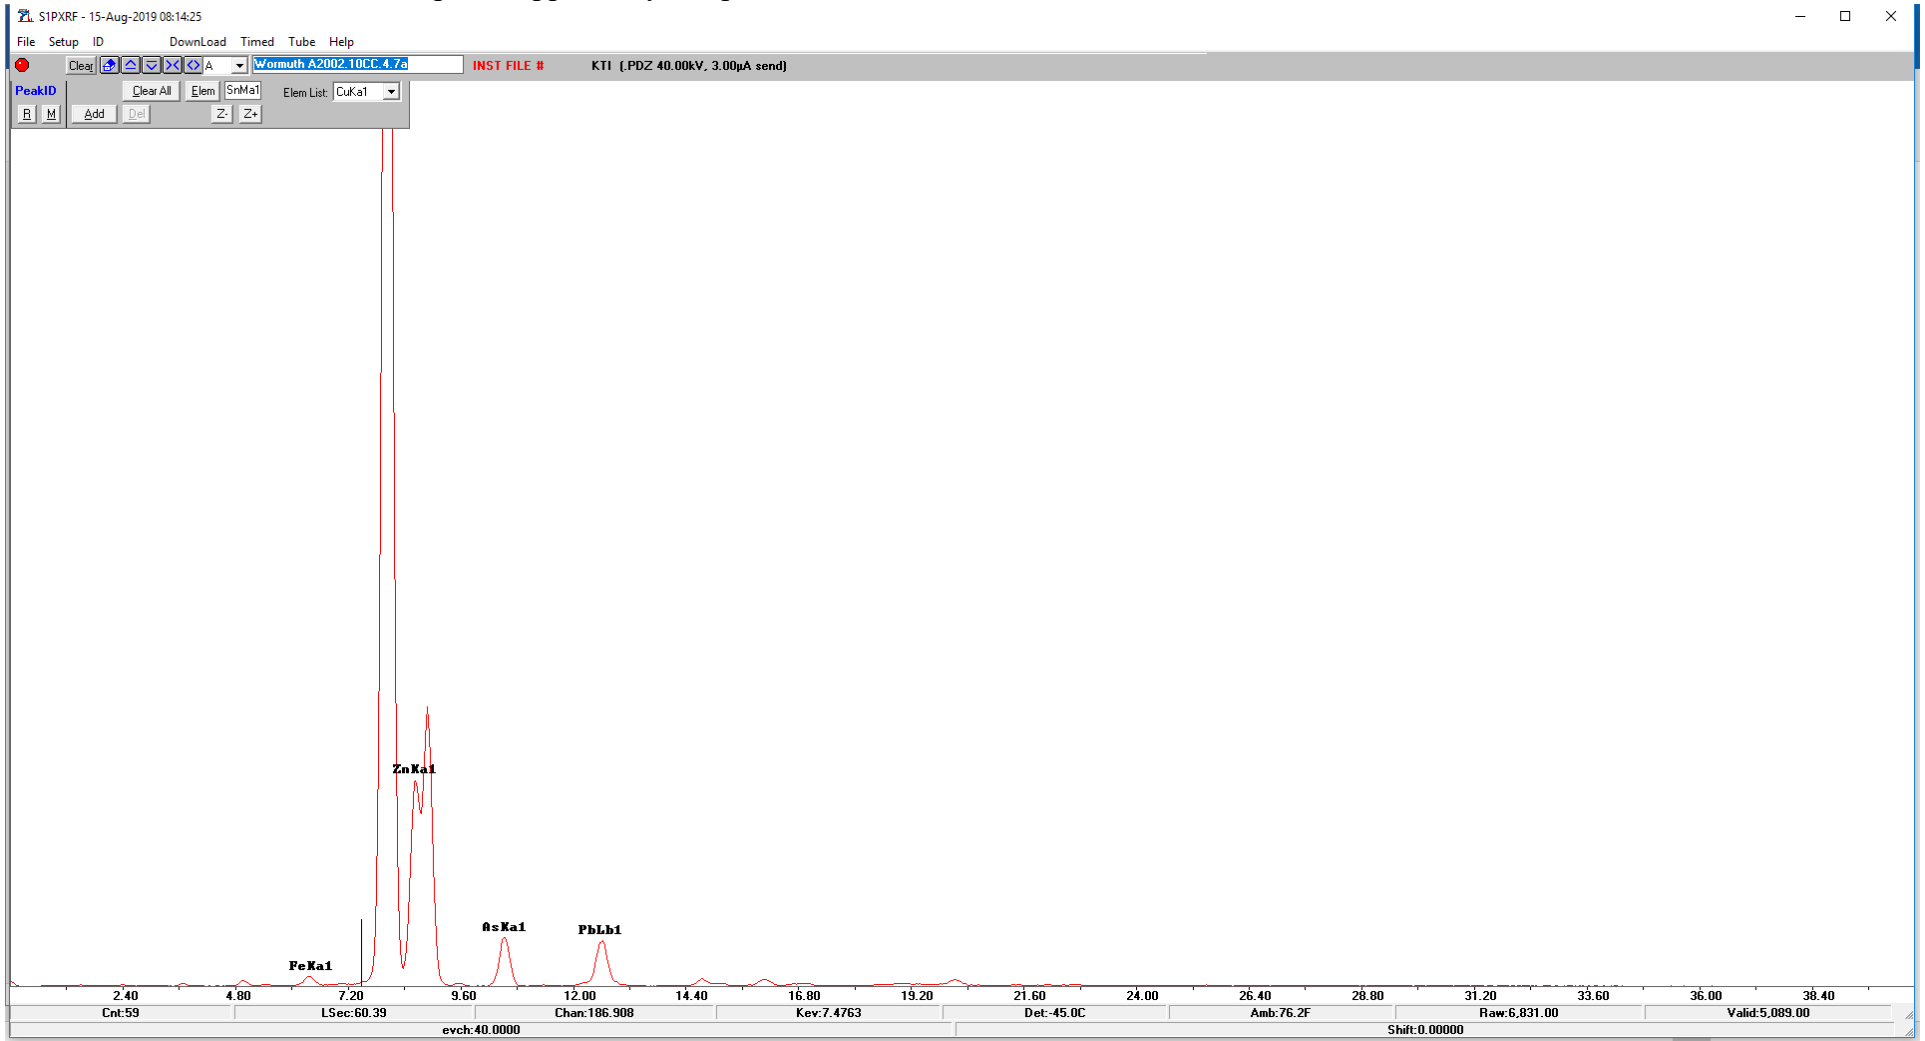

| Wormuth A2002.10CC.4.7a | Energy1 | Energy2 | Chan-Start | Chan-End | Chan-Counts | ROI      |
|-------------------------|---------|---------|------------|----------|-------------|----------|
| FeKa1                   | 6.2347  | 6.573   | 155.8667   | 164.3253 | 1271.93     | 0.005389 |
| CuKa1                   | 7.8658  | 8.2298  | 196.6451   | 205.7439 | 194970.5    | 0.826112 |
| ZnKa1                   | 8.4525  | 8.8252  | 211.3124   | 220.6306 | 27158.47    | 0.115073 |
| AsKa1                   | 10.3439 | 10.7436 | 258.5966   | 268.5894 | 6227.05     | 0.026385 |
| PbLb1                   | 12.4002 | 12.8272 | 310.0038   | 320.6812 | 6381.93     | 0.027041 |

# Wormuth A2002.10CC.4.7b European copper alloy scrap

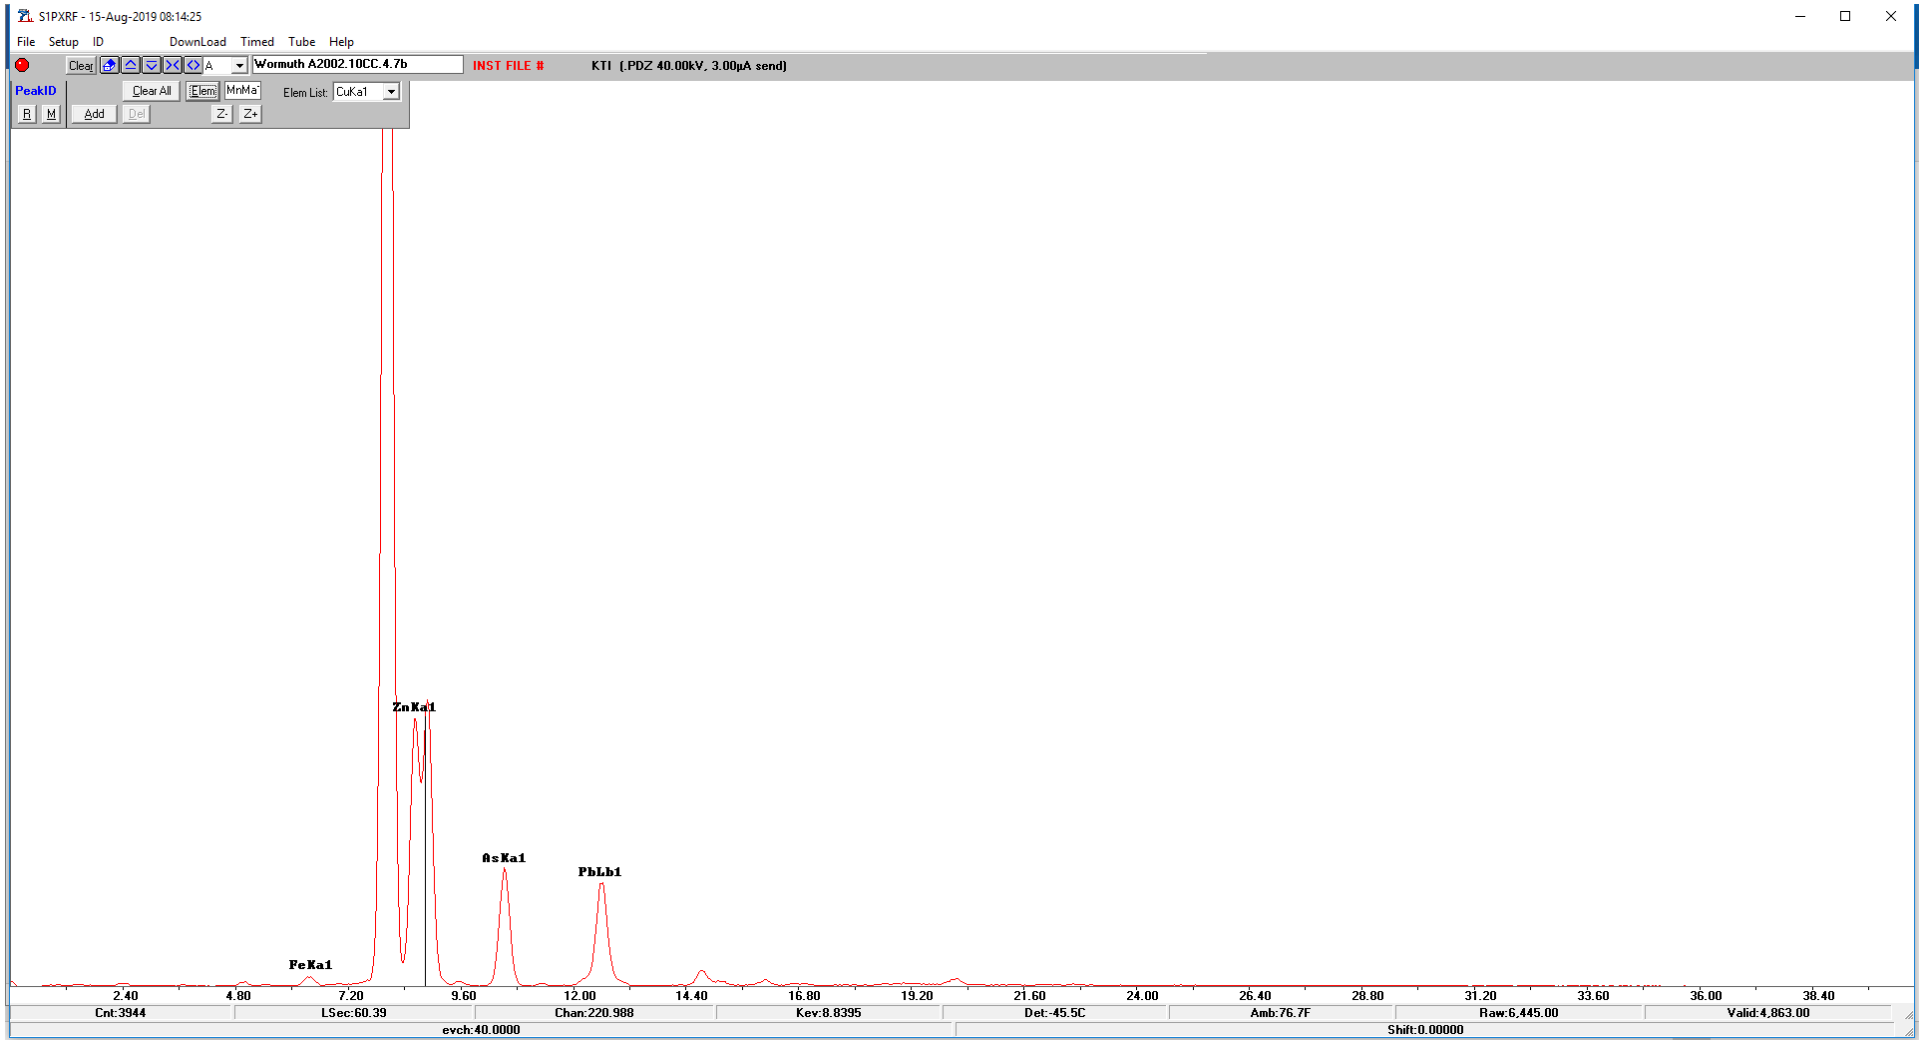

Wormuth A2002.10CC.4.7c European copper alloy scrap

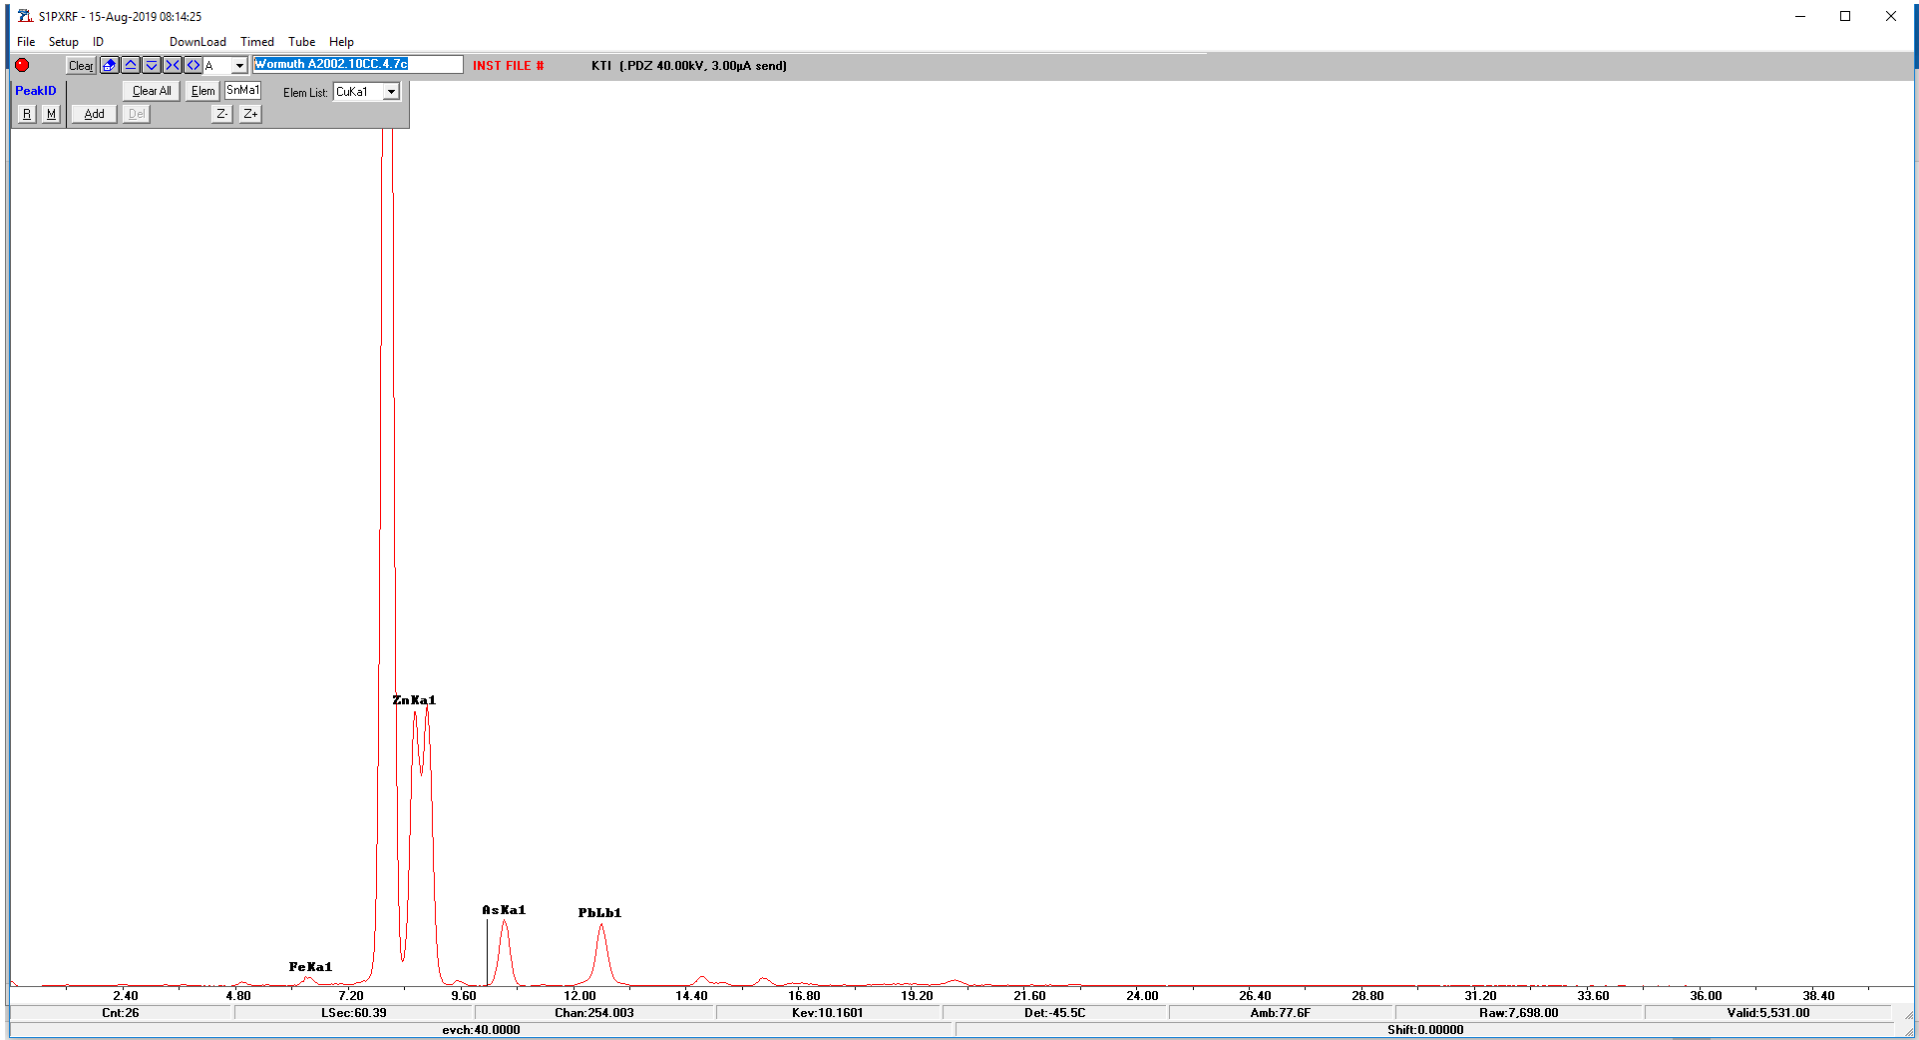

| Wormuth A2002.10CC.4.7c | Energy1 | Energy2 | Chan-Start | Chan-End | Chan-Counts | ROI      |
|-------------------------|---------|---------|------------|----------|-------------|----------|
| FeKa1                   | 6.2347  | 6.573   | 155.8667   | 164.3253 | 1284.6      | 0.004909 |
| CuKa1                   | 7.8658  | 8.2298  | 196.6451   | 205.7439 | 205810.5    | 0.786511 |
| ZnKa1                   | 8.4525  | 8.8252  | 211.3124   | 220.6306 | 37065.57    | 0.141647 |
| AsKa1                   | 10.3439 | 10.7436 | 258.5966   | 268.5894 | 8738.9      | 0.033396 |
| PbLb1                   | 12.4002 | 12.8272 | 310.0038   | 320.6812 | 8775.85     | 0.033537 |

Wormuth A2002.10CC.4.7d European copper alloy scrap

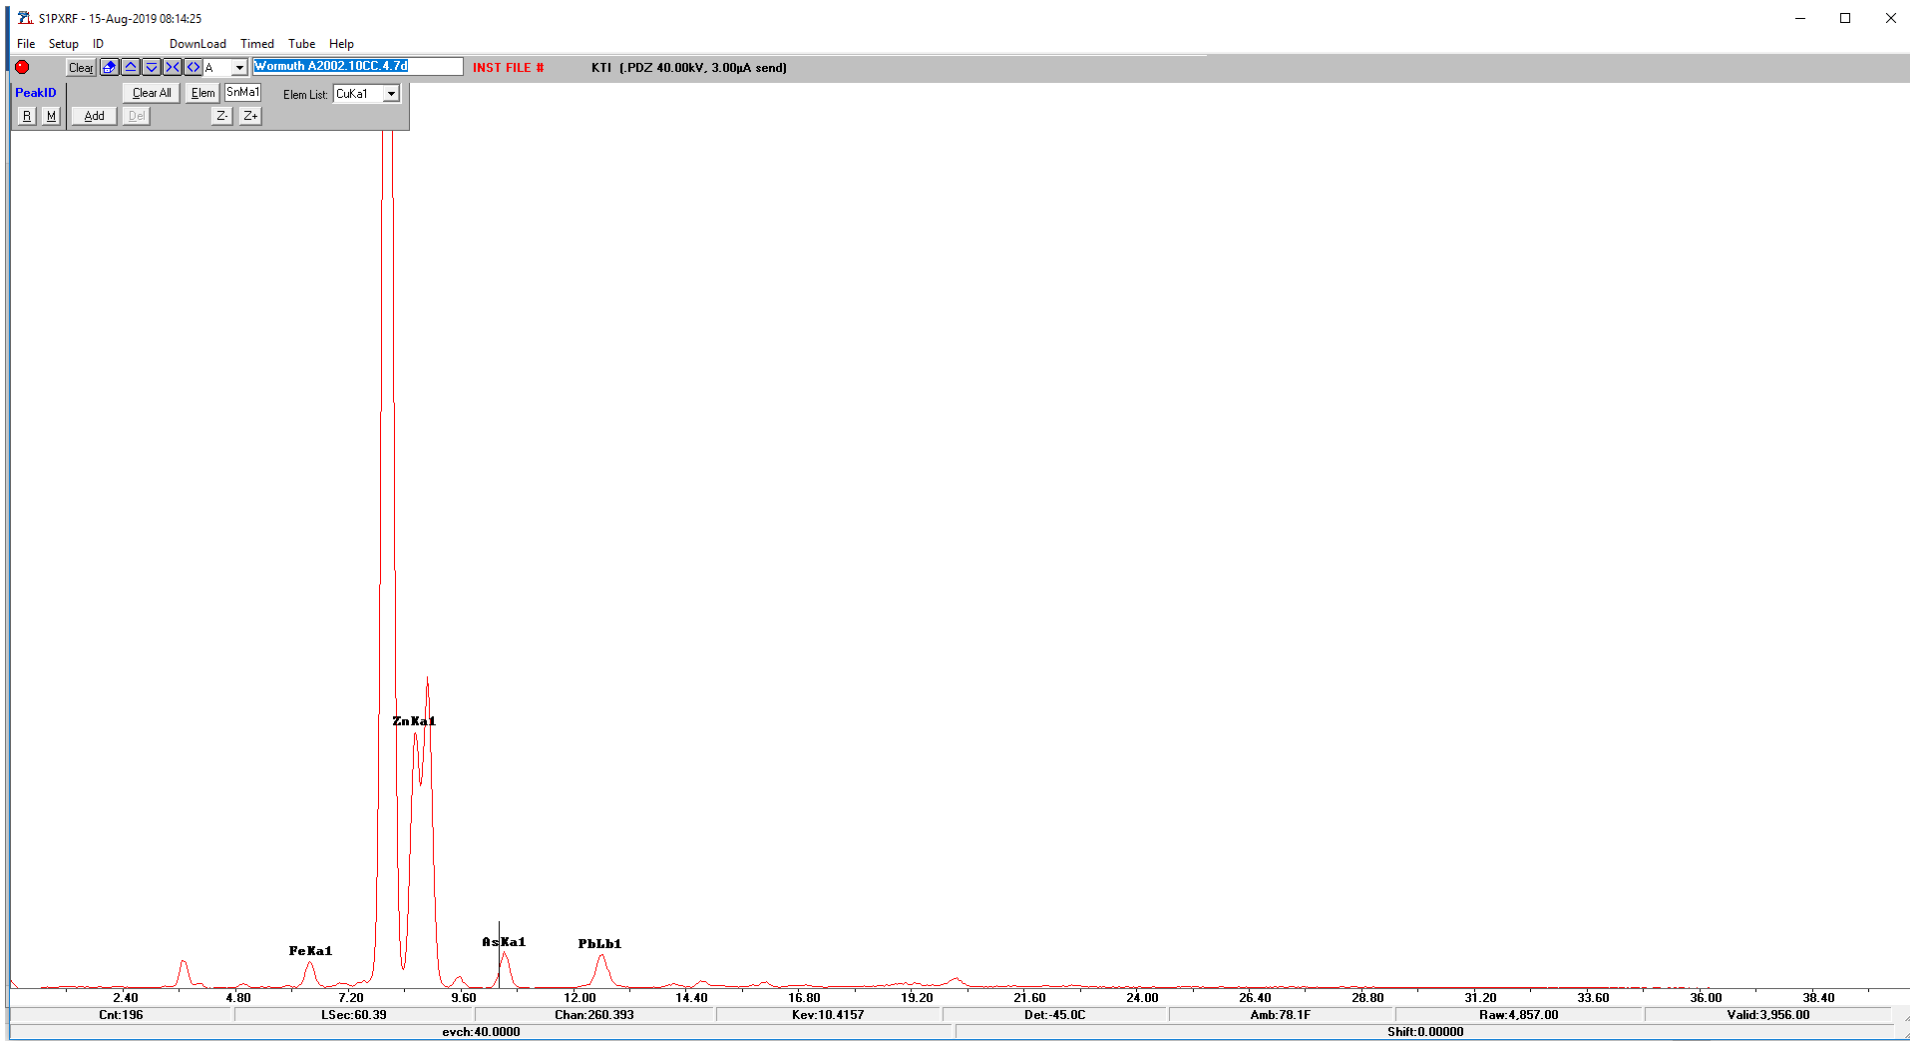

| Wormuth A2002.10CC.4.7d | Energy1 | Energy2 | Chan-Start | Chan-End | Chan-Counts | ROI      |
|-------------------------|---------|---------|------------|----------|-------------|----------|
| FeKa1                   | 6.2347  | 6.573   | 155.8667   | 164.3253 | 2180.05     | 0.012841 |
| CuKa1                   | 7.8658  | 8.2298  | 196.6451   | 205.7439 | 137543.1    | 0.810151 |
| ZnKa1                   | 8.4525  | 8.8252  | 211.3124   | 220.6306 | 23545       | 0.138684 |
| AsKa1                   | 10.3439 | 10.7436 | 258.5966   | 268.5894 | 3103.9      | 0.018282 |
| PbLb1                   | 12.4002 | 12.8272 | 310.0038   | 320.6812 | 3402.56     | 0.020042 |

Briggs Run A2005.13AG.99.10a European copper alloy triangular point

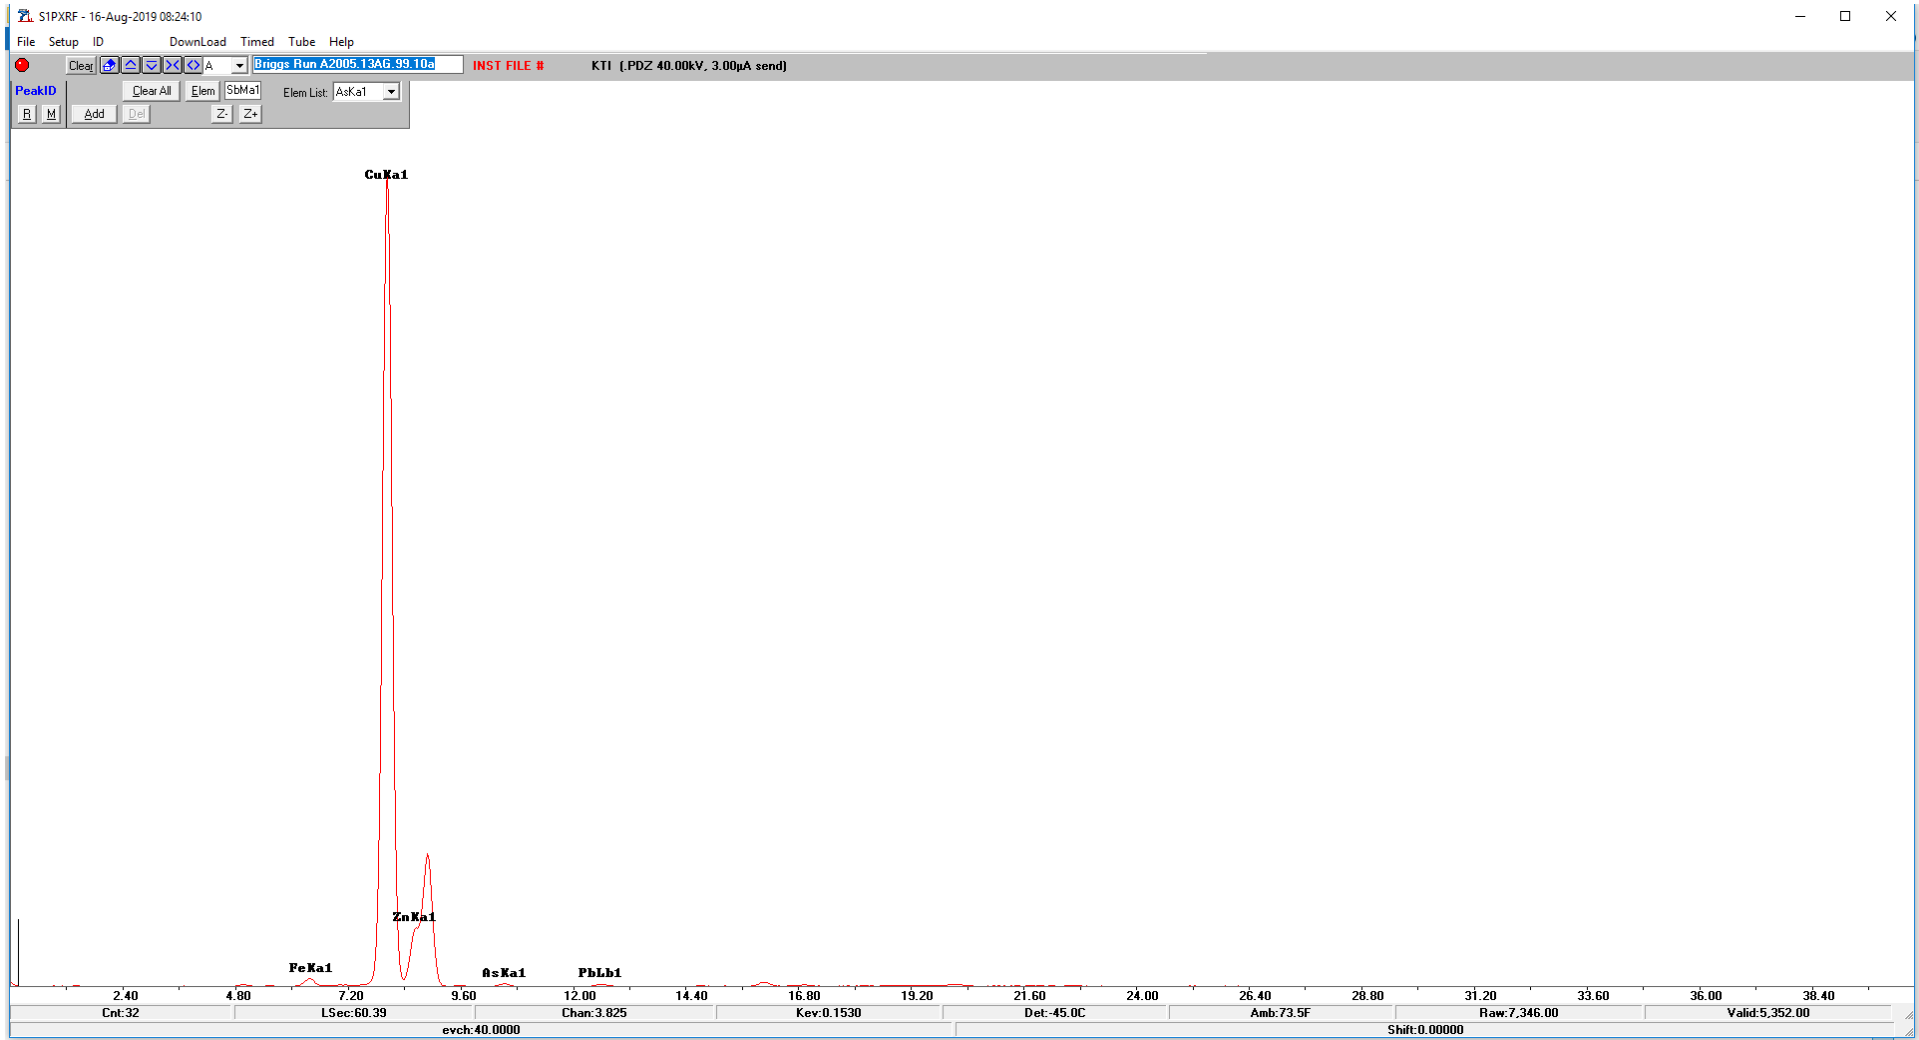

| Briggs Run A2005.13AG.99.10a | Energy1 | Energy2 | Chan-Start | Chan-End | Chan-Counts | ROI      |
|------------------------------|---------|---------|------------|----------|-------------|----------|
| FeKa1                        | 6.2347  | 6.573   | 155.8667   | 164.3253 | 2350        | 0.009302 |
| CuKa1                        | 7.8658  | 8.2298  | 196.6451   | 205.7439 | 228375      | 0.903992 |
| ZnKa1                        | 8.4525  | 8.8252  | 211.3124   | 220.6306 | 20251.2     | 0.080162 |
| AsKa1                        | 10.3439 | 10.7436 | 258.5966   | 268.5894 | 865.63      | 0.003426 |
| PbLb1                        | 12.4002 | 12.8272 | 310.0038   | 320.6812 | 787.54      | 0.003117 |

Briggs Run A2005.13AG.99.10b European copper alloy triangular point

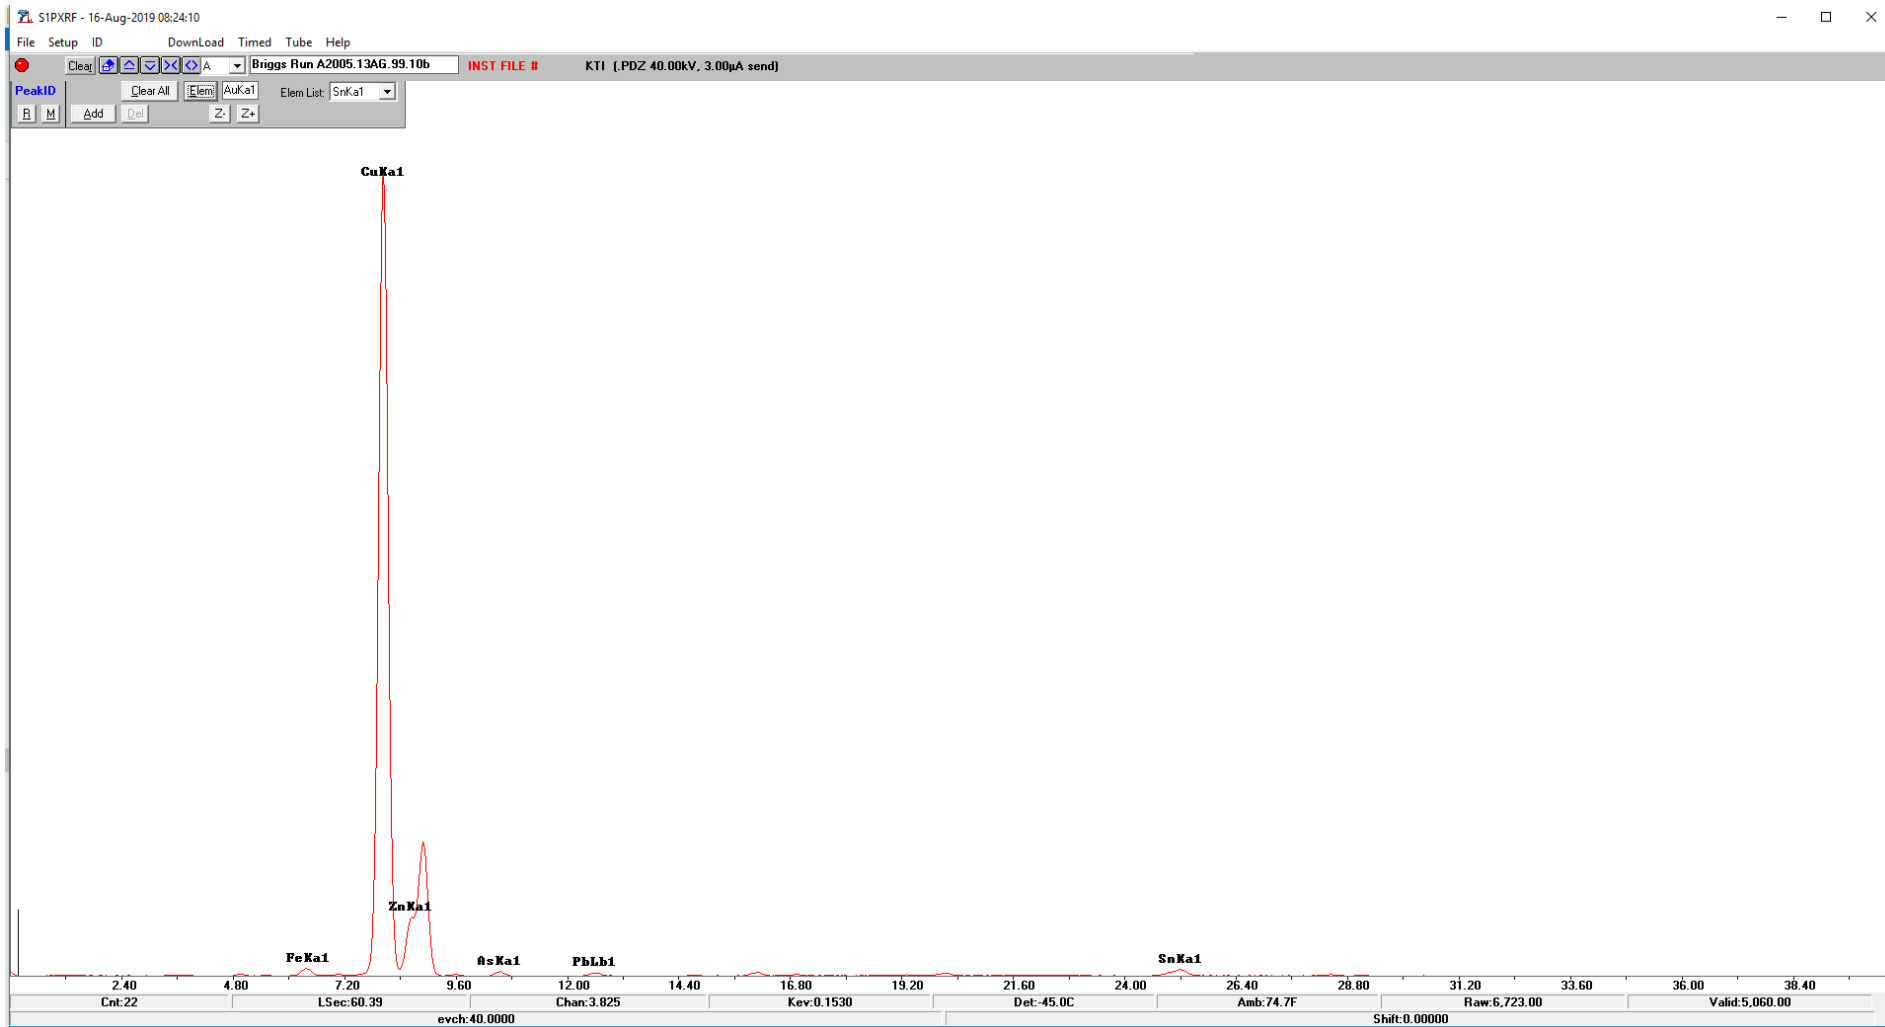

| Briggs Run A2005.13AG.99.10b | Energy1 | Energy2 | Chan-Start | Chan-End | Chan-Counts | ROI      |
|------------------------------|---------|---------|------------|----------|-------------|----------|
| FeKa1                        | 6.2347  | 6.573   | 155.8667   | 164.3253 | 2069.47     | 0.00891  |
| CuKa1                        | 7.8658  | 8.2298  | 196.6451   | 205.7439 | 20657.3     | 0.889363 |
| ZnKa1                        | 8.4525  | 8.8252  | 211.3124   | 220.6306 | 18390.52    | 0.079183 |
| AsKa1                        | 10.3439 | 10.7436 | 258.5966   | 268.5894 | 1237.36     | 0.005328 |
| PbLb1                        | 12.4002 | 12.8272 | 310.0038   | 320.6812 | 1064.14     | 0.004582 |
| SnKa1                        | 24.9881 | 25.5545 | 624.7016   | 638.8634 | 2934.27     | 0.012634 |

Briggs Run A2005.13AG.99.10c European copper alloy metal tinkler



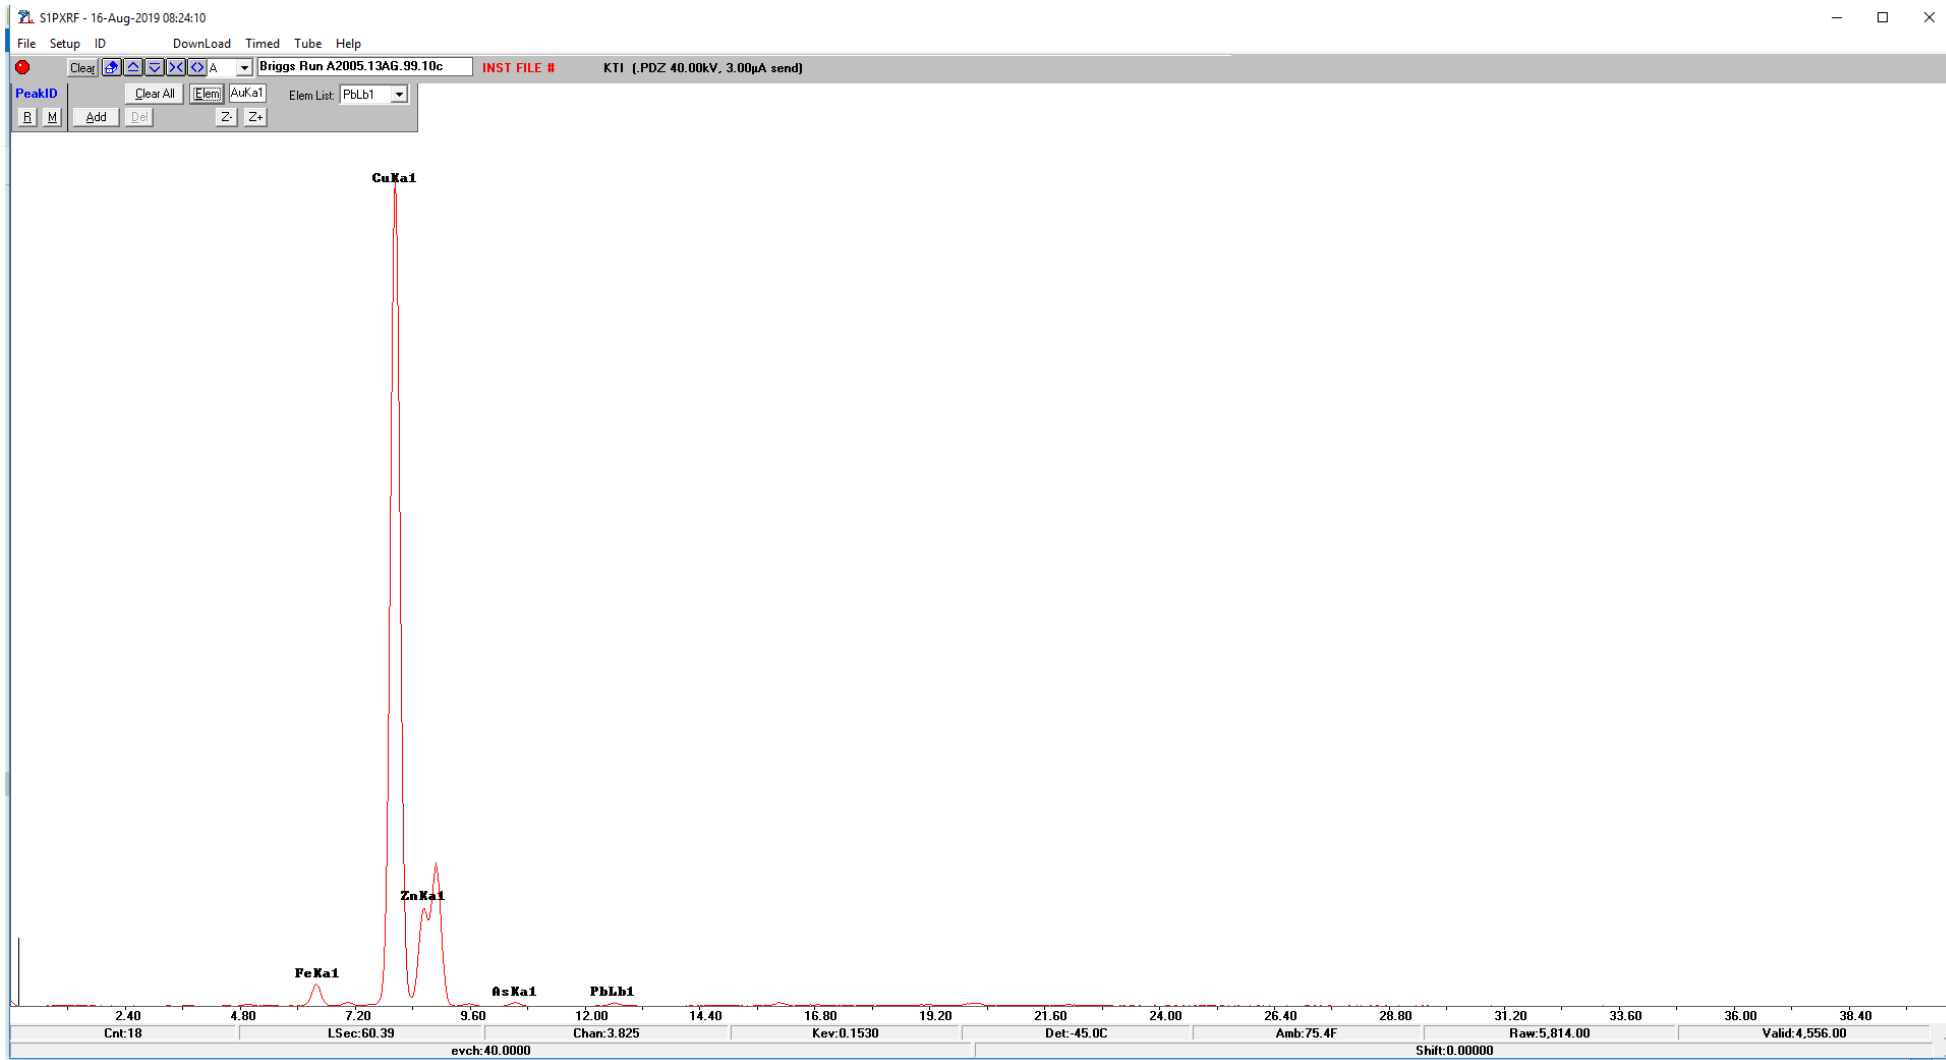

| Briggs Run A2005.13AG.99.10c | Energy1 | Energy2 | Chan-Start | Chan-End | Chan-Counts | ROI      |
|------------------------------|---------|---------|------------|----------|-------------|----------|
| FeKa1                        | 6.2347  | 6.573   | 155.8667   | 164.3253 | 4636.55     | 0.021946 |
| CuKa1                        | 7.8658  | 8.2298  | 196.6451   | 205.7439 | 180078.3    | 0.852371 |
| ZnKa1                        | 8.4525  | 8.8252  | 211.3124   | 220.6306 | 24754.19    | 0.11717  |
| AsKa1                        | 10.3439 | 10.7436 | 258.5966   | 268.5894 | 922.96      | 0.004369 |
| PbLb1                        | 12.4002 | 12.8272 | 310.0038   | 320.6812 | 875.48      | 0.004144 |

Briggs Run A2005.13AG.99.10d European copper alloy metal tinkler

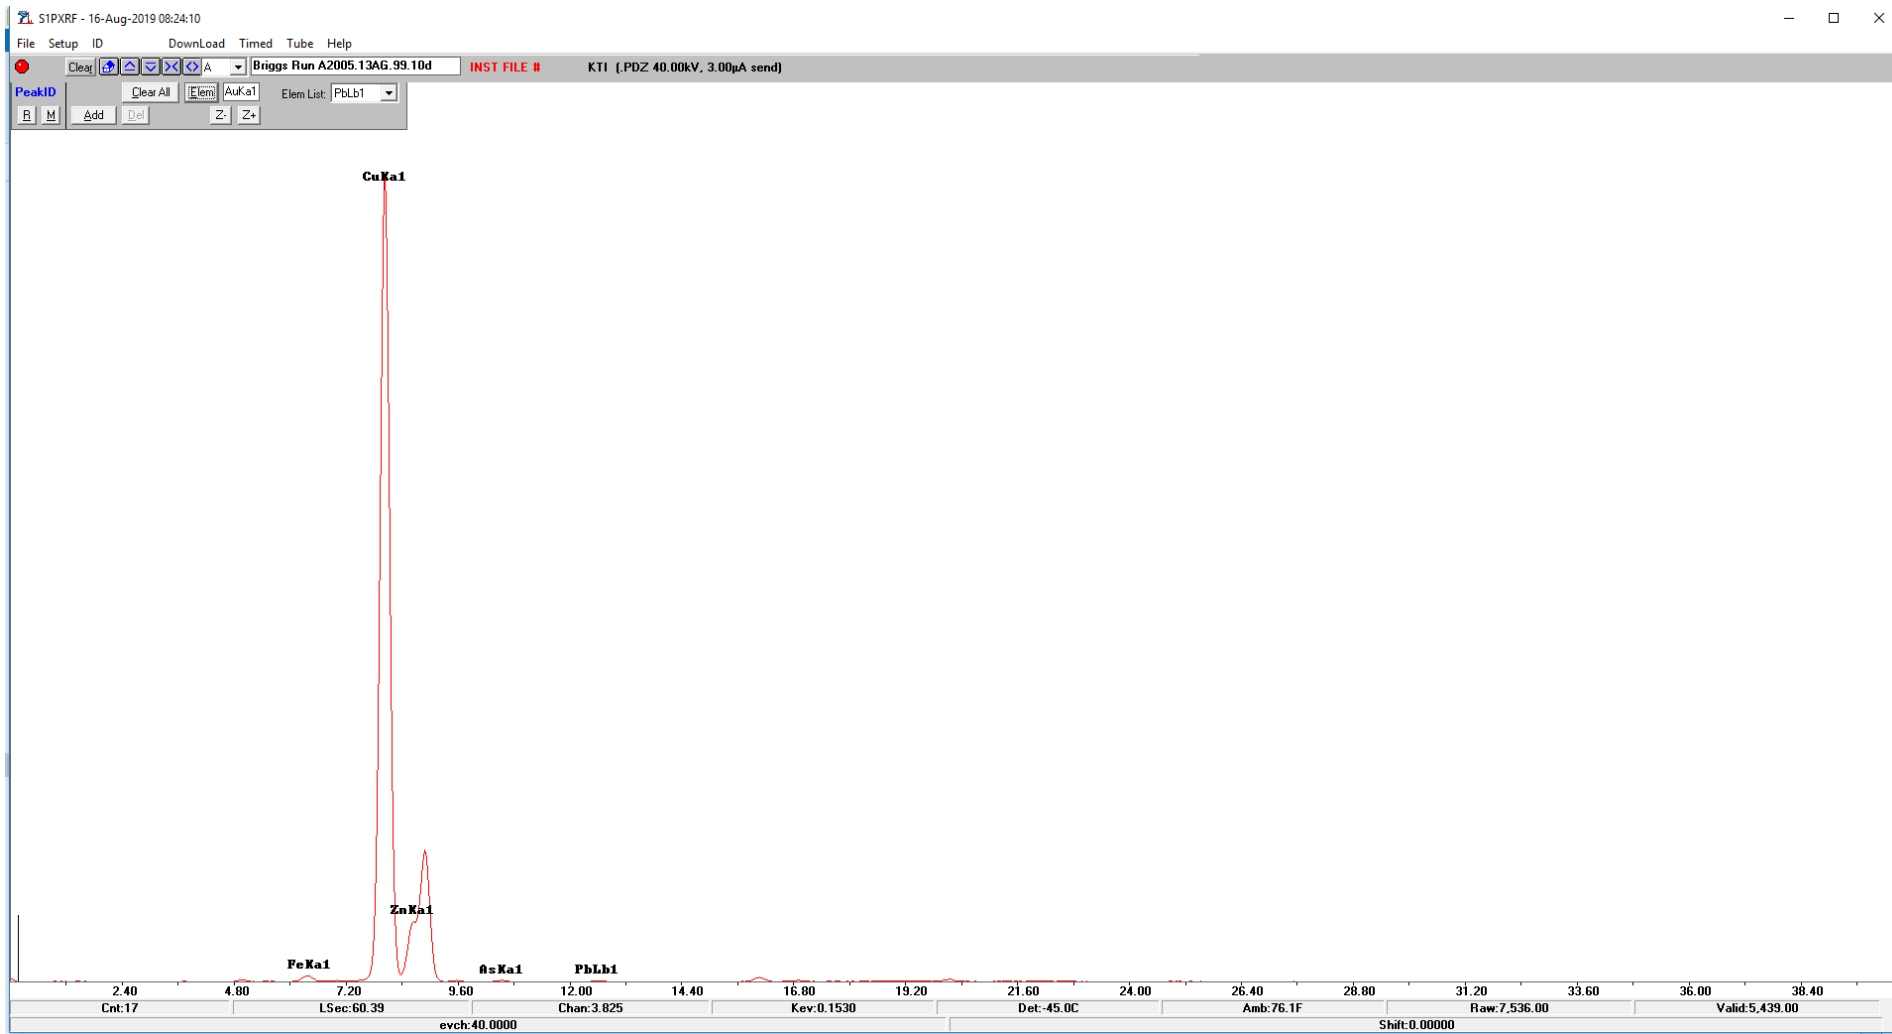

| Briggs Run A2005.13AG.99.10d | Energy1 | Energy2 | Chan-Start | Chan-End | Chan-Counts | ROI      |
|------------------------------|---------|---------|------------|----------|-------------|----------|
| FeKa1                        | 6.2347  | 6.573   | 155.8667   | 164.3253 | 1958.98     | 0.007722 |
| CuKa1                        | 7.8658  | 8.2298  | 196.6451   | 205.7439 | 229606.5    | 0.905048 |
| ZnKa1                        | 8.4525  | 8.8252  | 211.3124   | 220.6306 | 21093       | 0.083143 |
| AsKa1                        | 10.3439 | 10.7436 | 258.5966   | 268.5894 | 544.66      | 0.002147 |
| PbLb1                        | 12.4002 | 12.8272 | 310.0038   | 320.6812 | 492.19      | 0.00194  |

Briggs collection A-2204 post-contact European copper triangular point, Mohawk Valley.

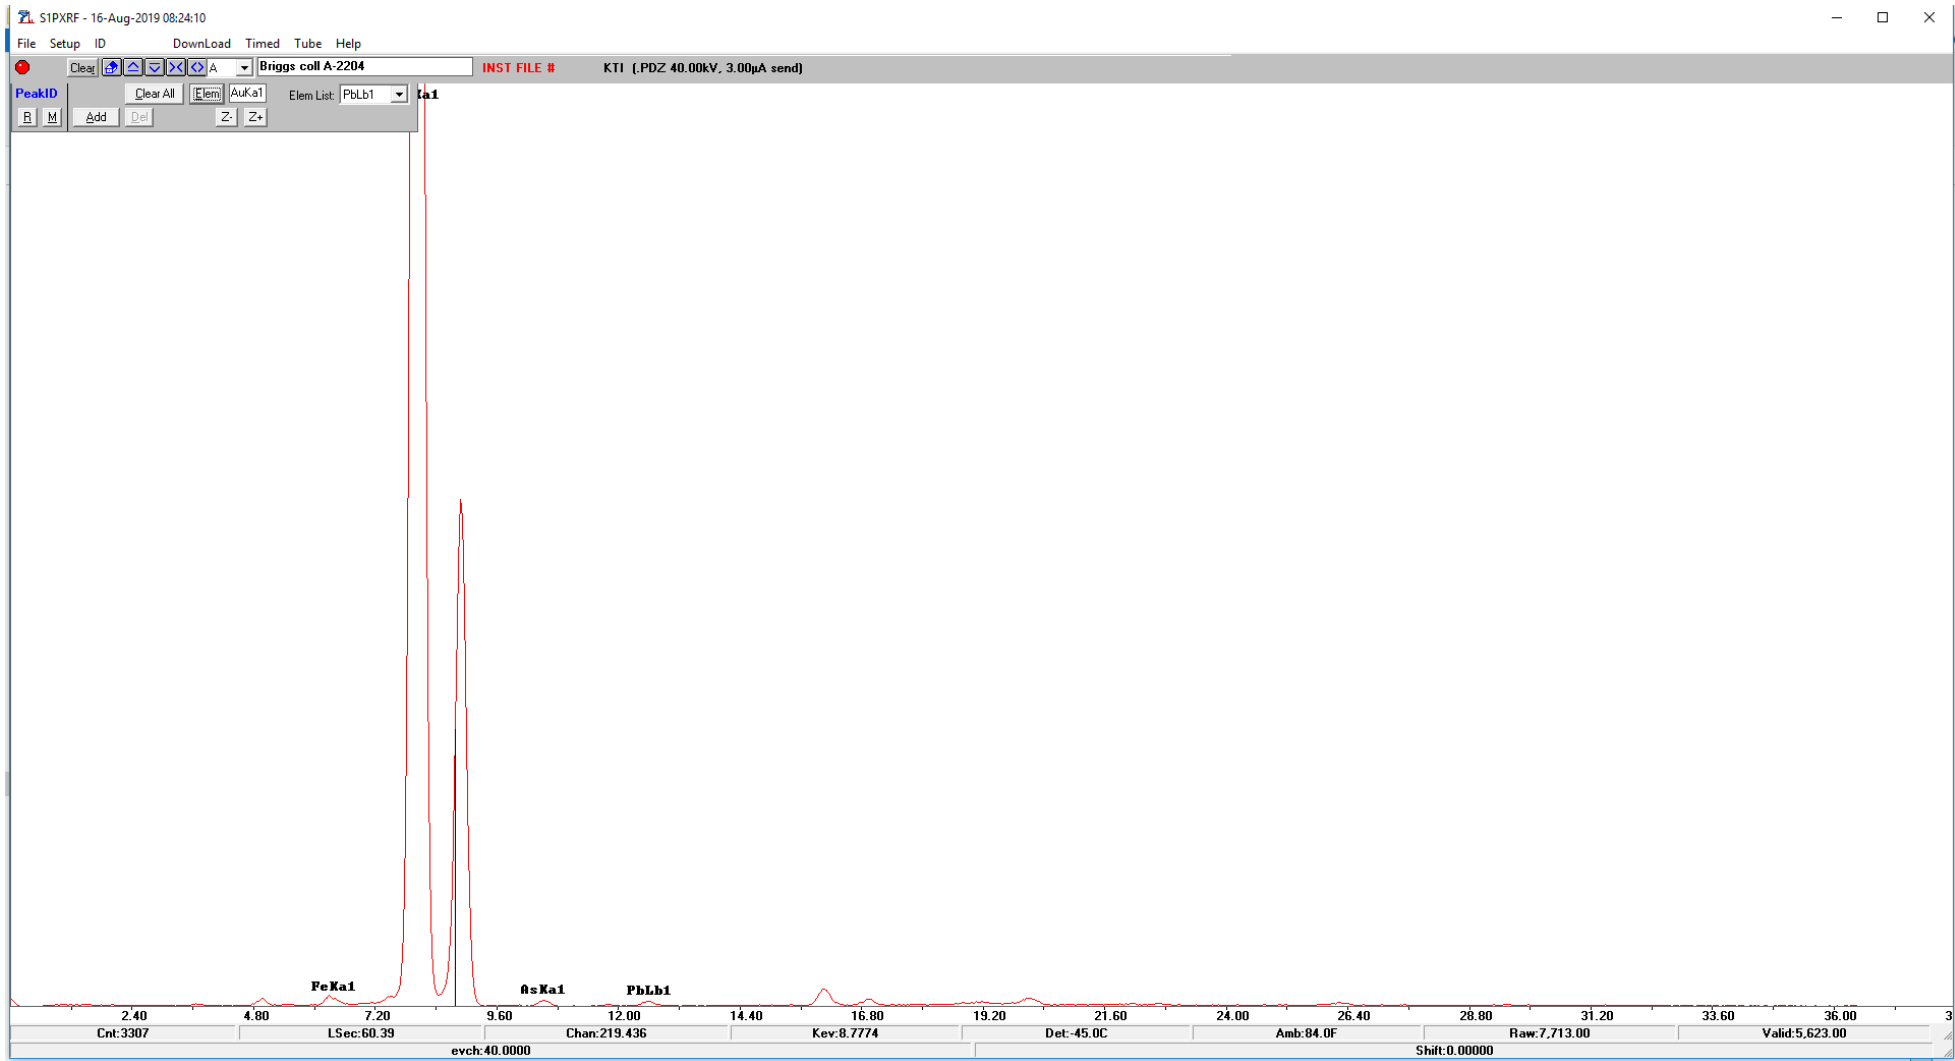

| Briggs coll A-2204 | Energy1 | Energy2 | Chan-Start | Chan-End | Chan-Counts | ROI      |
|--------------------|---------|---------|------------|----------|-------------|----------|
| FeKa1              | 6.2347  | 6.573   | 155.8667   | 164.3253 | 924.85      | 0.003674 |
| CuKa1              | 7.8658  | 8.2298  | 196.6451   | 205.7439 | 249749.1    | 0.992186 |
| AsKa1              | 10.3439 | 10.7436 | 258.5966   | 268.5894 | 550.71      | 0.002188 |
| PbLb1              | 12.4002 | 12.8272 | 310.0038   | 320.6812 | 491.4       | 0.001952 |

Briggs collection A-2205 post-contact European copper triangular point, Mohawk Valley.

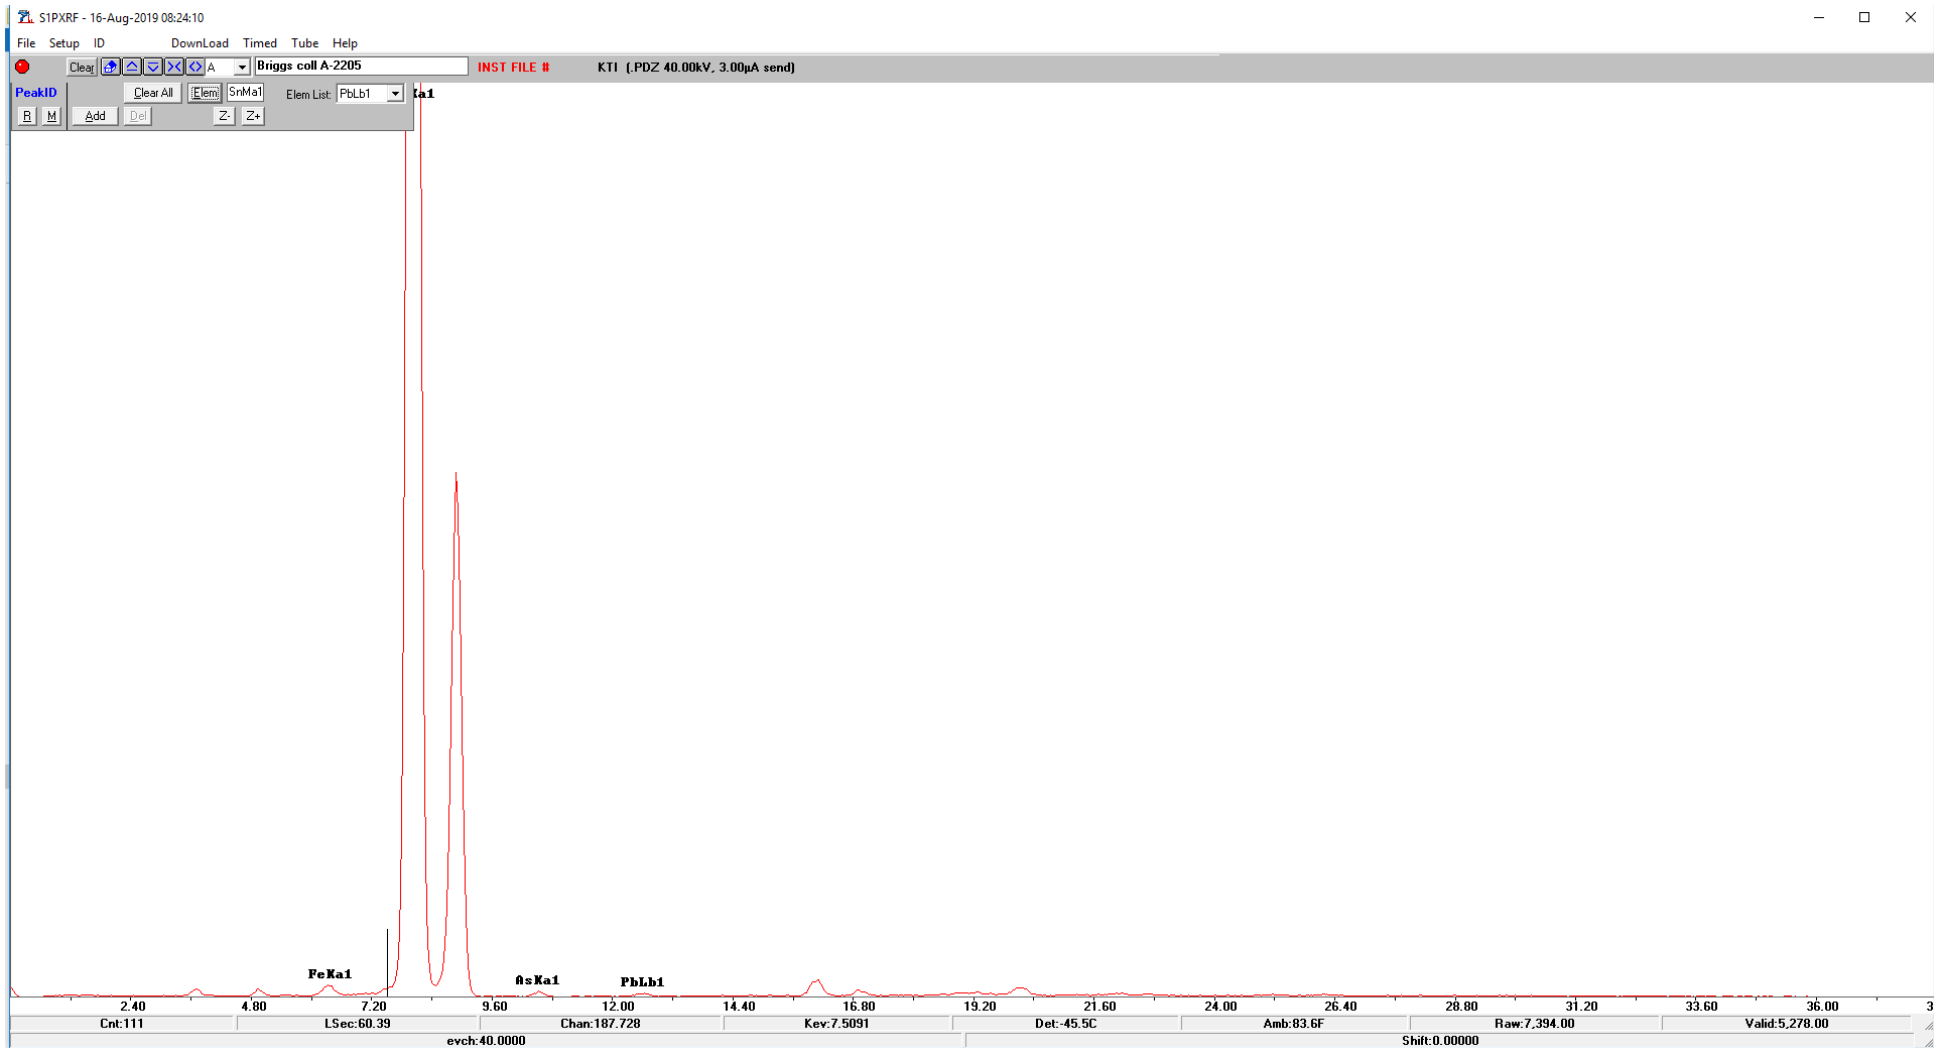

| Briggs coll A-2205 | Energy1 | Energy2 | Chan-Start | Chan-End | Chan-Counts | ROI      |
|--------------------|---------|---------|------------|----------|-------------|----------|
| FeKa1              | 6.2347  | 6.573   | 155.8667   | 164.3253 | 1023.12     | 0.004245 |
| CuKa1              | 7.8658  | 8.2298  | 196.6451   | 205.7439 | 239171.3    | 0.992359 |
| AsKa1              | 10.3439 | 10.7436 | 258.5966   | 268.5894 | 437.15      | 0.001814 |
| PbLb1              | 12.4002 | 12.8272 | 310.0038   | 320.6812 | 381.39      | 0.001582 |
